# Supplementary material for: Probing solvent effects on mixed aggregates associating a chiral lithium amide and n-BuLi by NMR: from structure to reactivity
Source: Royal Society of Chemistry journal article supplement (doi:10.1039/c4dt01156b), 2014-01-01

*Supporting Information for*

**Probing Solvent Effects on Mixed Aggregates Associating a Chiral Lithium Amide and *n*-BuLi by NMR: From Structure to Reactivity**

**Gabriella Barozzino-Consiglio, Mathieu Rouen, Hassan Oulyadi,\* Jacques Maddaluno and Anne Harrison-Marchand\***

*Université de Rouen, CNRS, INSA de Rouen, UMR 6014 & FR 3038, IRCOF: Laboratoire COBRA, 76821 Mont Saint Aignan Cedex (France)*

*E-mail: [hassan.oulyadi@univ-rouen.fr](mailto:hassan.oulyadi@univ-rouen.fr)*

*E-mail: [anne.harrison@univ-rouen.fr](mailto:anne.harrison@univ-rouen.fr)*

**Table of Contents:**

|                                                                                                                                                                                                                 |           |
|-----------------------------------------------------------------------------------------------------------------------------------------------------------------------------------------------------------------|-----------|
| <b>1. Instrumental Considerations</b>                                                                                                                                                                           | <b>S2</b> |
| <b>2. NMR spectra of amine <b>3a</b> and amide <b>4a</b> in Et<sub>2</sub>O<sub>d10</sub></b>                                                                                                                   | <b>S3</b> |
| Figure S1: <sup>1</sup> H NMR spectra of <b>3a</b> at 195K (a) and <b>4a</b> at 195K (b) and at 250K (c) in Et <sub>2</sub> O <sub>d10</sub>                                                                    | S3        |
| Figure S2: <sup>13</sup> C{ <sup>1</sup> H} NMR spectra of <b>3a</b> (top) and <b>4a</b> (bottom) in Et <sub>2</sub> O <sub>d10</sub> at 195K                                                                   | S4        |
| Figure S3: <sup>1</sup> H, <sup>13</sup> C-HMQC spectrum of <b>4a</b> at 195K                                                                                                                                   | S5        |
| Figure S4: <sup>1</sup> H, <sup>13</sup> C-HMBC spectrum of <b>4a</b> at 195K                                                                                                                                   | S5        |
| Figure S5: <sup>1</sup> H, <sup>1</sup> H-COSY spectrum of <b>4a</b> at 195K                                                                                                                                    | S6        |
| Figure S6: <sup>6</sup> Li NMR spectra of <i>n</i> -BuLi (top) and <b>4a</b> (bottom) in Et <sub>2</sub> O <sub>d10</sub> at 195K                                                                               | S7        |
| Figure S7: <sup>6</sup> Li NMR spectra with resolution enhancement (GB = 0.1, LB = -0.5) (top) and proton H <sup>1</sup> selective decoupling (bottom) of <b>4a</b> in Et <sub>2</sub> O <sub>d10</sub> at 250K | S7        |
| Figure S8: <sup>1</sup> H, <sup>1</sup> H-NOESY spectrum (mixing time τ <sub>m</sub> = 0.60s) of <b>4a</b> in Et <sub>2</sub> O <sub>d10</sub> at 250K                                                          | S8        |
| Figure S9: <sup>1</sup> H-DOSY spectrum of <b>4a</b> in Et <sub>2</sub> O <sub>d10</sub> at 195K                                                                                                                | S9        |

|                                                                                                                                                                                                                                          |            |
|------------------------------------------------------------------------------------------------------------------------------------------------------------------------------------------------------------------------------------------|------------|
| Figure S10: Decay curves of <sup>1</sup> H-DOSY for Internal References [COE (a), HMDS (b), SQA (c)] and <b>4a</b> (d) in Et <sub>2</sub> O <sub>d10</sub> at 195K                                                                       | S9         |
| Table S1: D-FW analyses of <sup>1</sup> H-DOSY data of <b>4a</b> in Et <sub>2</sub> O <sub>d10</sub> at 195K                                                                                                                             | S10        |
| <b>3. NMR spectra of amine 3a and amide 4a in THF<sub>d8</sub></b>                                                                                                                                                                       | <b>S11</b> |
| Figure S11: <sup>1</sup> H NMR spectra of <b>3a</b> (top) and <b>4a</b> (bottom) in THF <sub>d8</sub> at 195K                                                                                                                            | S11        |
| Figure S12: <sup>13</sup> C{ <sup>1</sup> H} NMR spectra of <b>3a</b> (top) and <b>4a</b> (bottom) in THF <sub>d8</sub> at 195K                                                                                                          | S12        |
| Figure S13: <sup>1</sup> H, <sup>13</sup> C-HMQC spectrum of <b>4a</b> in THF <sub>d8</sub> at 195K                                                                                                                                      | S13        |
| Figure S14: <sup>1</sup> H, <sup>13</sup> C-HMBC spectrum of <b>4a</b> in THF <sub>d8</sub> at 195K                                                                                                                                      | S13        |
| Figure S15: <sup>1</sup> H, <sup>1</sup> H-COSY spectrum of <b>4a</b> in THF <sub>d8</sub> at 195K                                                                                                                                       | S14        |
| Figure S16: <sup>6</sup> Li, <sup>1</sup> H-HOESY (mixing time τ <sub>m</sub> = 1.44s) spectrum of <b>4a</b> in THF <sub>d8</sub> at 195K                                                                                                | S15        |
| Figure S17: <sup>1</sup> H, <sup>1</sup> H-NOESY (mixing time τ <sub>m</sub> = 0.60s) spectrum of <b>4a</b> in THF <sub>d8</sub> at 195K                                                                                                 | S16        |
| Figure S18: <sup>1</sup> H-DOSY spectrum of <b>4a</b> in THF <sub>d8</sub> at 195K                                                                                                                                                       | S17        |
| Figure S19: Decay curves of <sup>1</sup> H-DOSY for Internal References [COE (a), HMDS (b), SQA (c)], monomer <b>4a</b> (d) and C <sub>2</sub> -dimer <b>4a</b> (e) in THF <sub>d8</sub> at 195K                                         | S17        |
| Table 2: D-FW analyses of <sup>1</sup> H-DOSY data of <b>4a</b> in THF <sub>d8</sub> at 195K                                                                                                                                             | S18        |
| <b>4. NMR spectra of 4a/n-BuLi complex in Et<sub>2</sub>O<sub>d10</sub> and THF<sub>d8</sub></b>                                                                                                                                         | <b>S19</b> |
| Figure S20: <sup>1</sup> H NMR spectra of <b>4a</b> (top) and <b>4a</b> + <i>n</i> -BuLi (bottom) in Et <sub>2</sub> O <sub>d10</sub> at 195K                                                                                            | S19        |
| Figure S21: <sup>1</sup> H NMR spectra of <i>n</i> -BuLi (a), <b>4a</b> (b) and <b>4a</b> + <i>n</i> -BuLi (c) in THF <sub>d8</sub> at 195K                                                                                              | S20        |
| Figure S22: <sup>13</sup> C{ <sup>1</sup> H} NMR spectra of <b>4a</b> (top) and <b>4a</b> + <i>n</i> -BuLi (bottom) in THF <sub>d8</sub> at 195K                                                                                         | S21        |
| Figure S23: <sup>1</sup> H, <sup>13</sup> C-HMQC spectrum of <b>4a</b> + <i>n</i> -BuLi in THF <sub>d8</sub> at 195K                                                                                                                     | S22        |
| Figure S24: <sup>1</sup> H, <sup>13</sup> C-HMQC spectrum of <b>4a</b> + <i>n</i> -BuLi in THF <sub>d8</sub> at 195K                                                                                                                     | S22        |
| Figure S25: <sup>1</sup> H, <sup>1</sup> H-COSY spectrum of <b>4a</b> + <i>n</i> -BuLi in THF <sub>d8</sub> at 195K                                                                                                                      | S23        |
| Figure S26: <sup>6</sup> Li, <sup>1</sup> H-HOESY (mixing time τ <sub>m</sub> = 1.44s) spectrum of <b>4a</b> + <i>n</i> -BuLi in THF <sub>d8</sub> at 195K                                                                               | S24        |
| Figure S27: <sup>1</sup> H, <sup>1</sup> H-NOESY (mixing time τ <sub>m</sub> = 0.60s) spectrum of <b>4a</b> + <i>n</i> -BuLi in THF <sub>d8</sub> at 195K                                                                                | S25        |
| Figure S28: <sup>1</sup> H-DOSY spectrum of <b>4a</b> / <i>n</i> -BuLi complex in THF <sub>d8</sub> at 195K                                                                                                                              | S26        |
| Figure S29: Decay curves of <sup>1</sup> H-DOSY for Internal References [COE (a), HMDS (b), SQA (c)], monomer <b>4a</b> (d), C <sub>2</sub> -dimer <b>4a</b> (e) and <b>4a</b> / <i>n</i> -BuLi complex (f) in THF <sub>d8</sub> at 195K | S26        |
| Table S3: D-FW analysis of <sup>1</sup> H-DOSY data of <b>4a</b> / <i>n</i> -BuLi complex in THF <sub>d8</sub> at 195K                                                                                                                   | S27        |

## 1. Instrumental Considerations

NMR spectra were recorded at 195K and 250K on a Bruker AVIII 500 spectrometer operating at 500.13 MHz for <sup>1</sup>H, 125.13 MHz for <sup>13</sup>C and 73.60 MHz for <sup>6</sup>Li. Experiments were run under TopSpin (version 2.1, Bruker Biospin, Karlsruhe) with a BBFO{<sup>1</sup>H,X} probe and a z gradient coil giving a maximum gradient of 50 G cm<sup>-1</sup>. <sup>1</sup>H and <sup>13</sup>C chemical shifts were referenced to the solvent residual signals (for Et<sub>2</sub>O<sub>d10</sub> at δ 3.34 ppm (<sup>1</sup>H) and 14.5 ppm (<sup>13</sup>C), for THF<sub>d8</sub> at δ 1.73 (<sup>1</sup>H) and 25.31 ppm(<sup>13</sup>C)). Lithium spectra were referenced to external 0.3 M <sup>6</sup>LiCl solution in THF<sub>d8</sub> (δ 0.0).

## 2. NMR spectra of amine 3a and amide 4a in Et<sub>2</sub>O<sub>d10</sub>

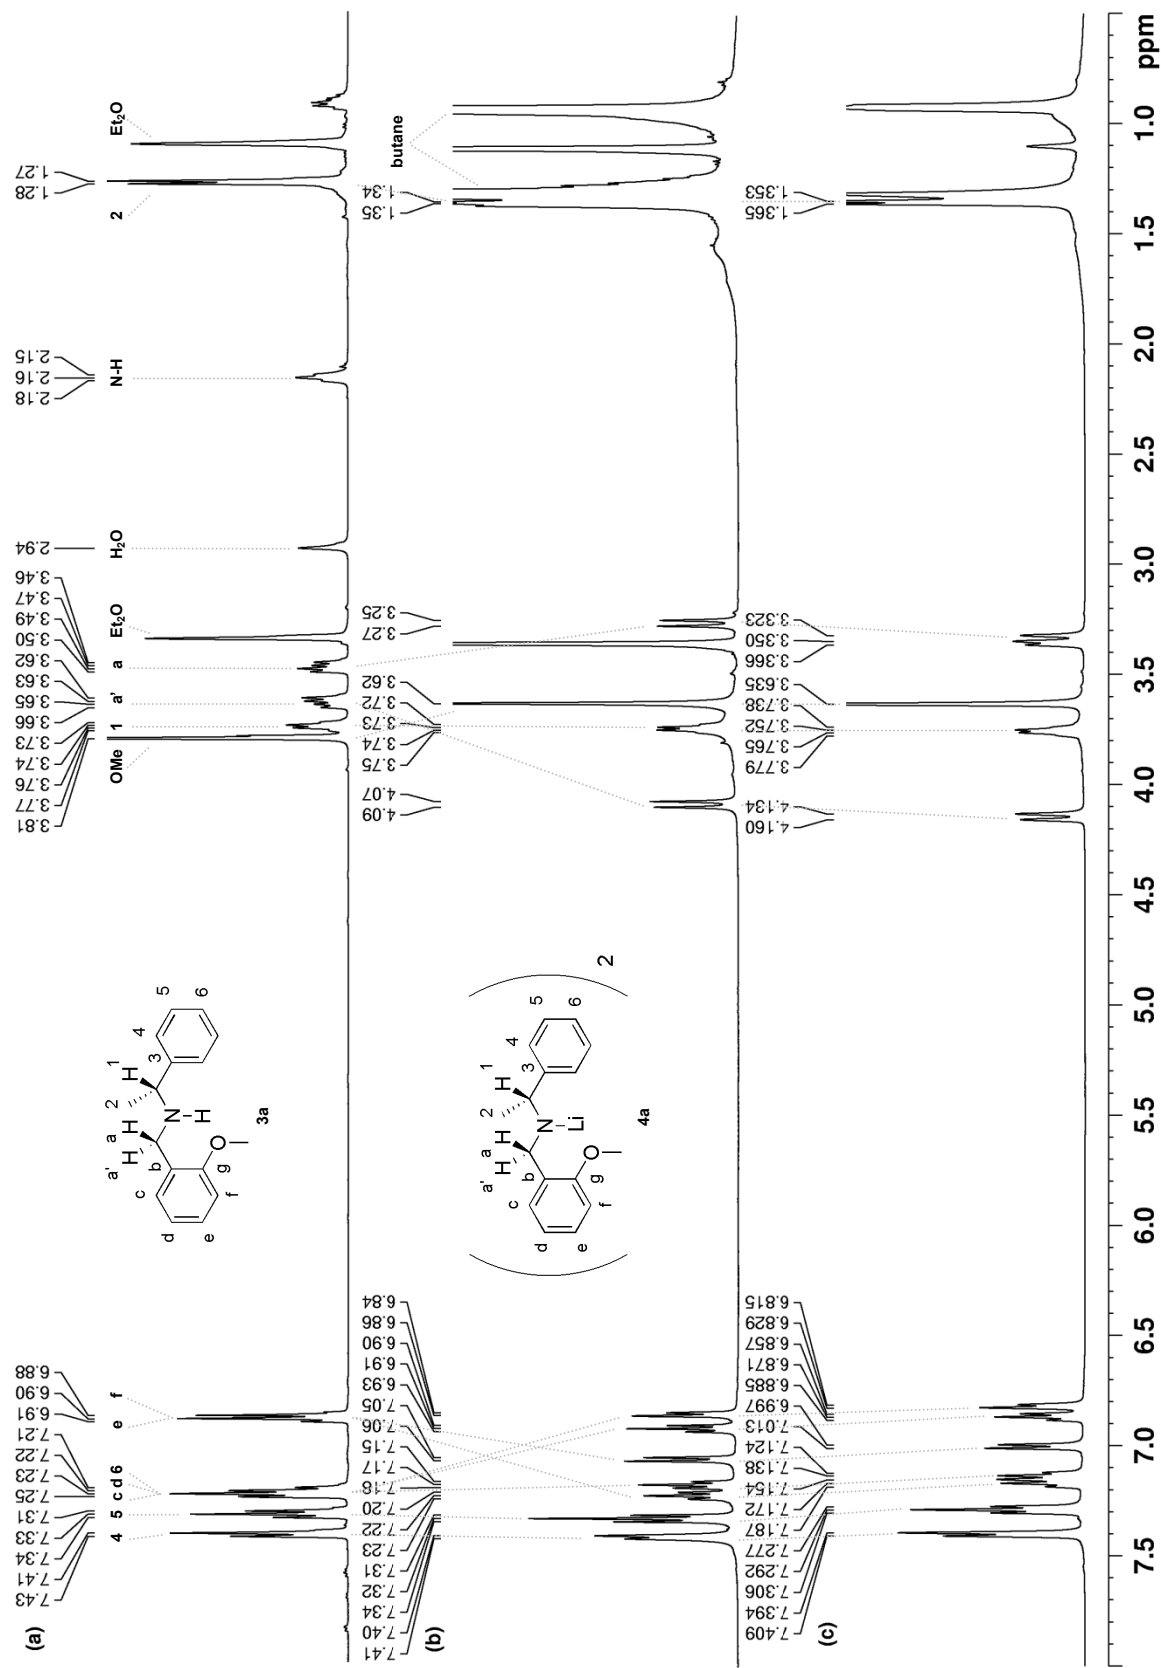

Figure S1. <sup>1</sup>H NMR spectra of 3a at 195K (a) and 4a at 195K (b) and at 250K (c) in Et<sub>2</sub>O<sub>d10</sub>

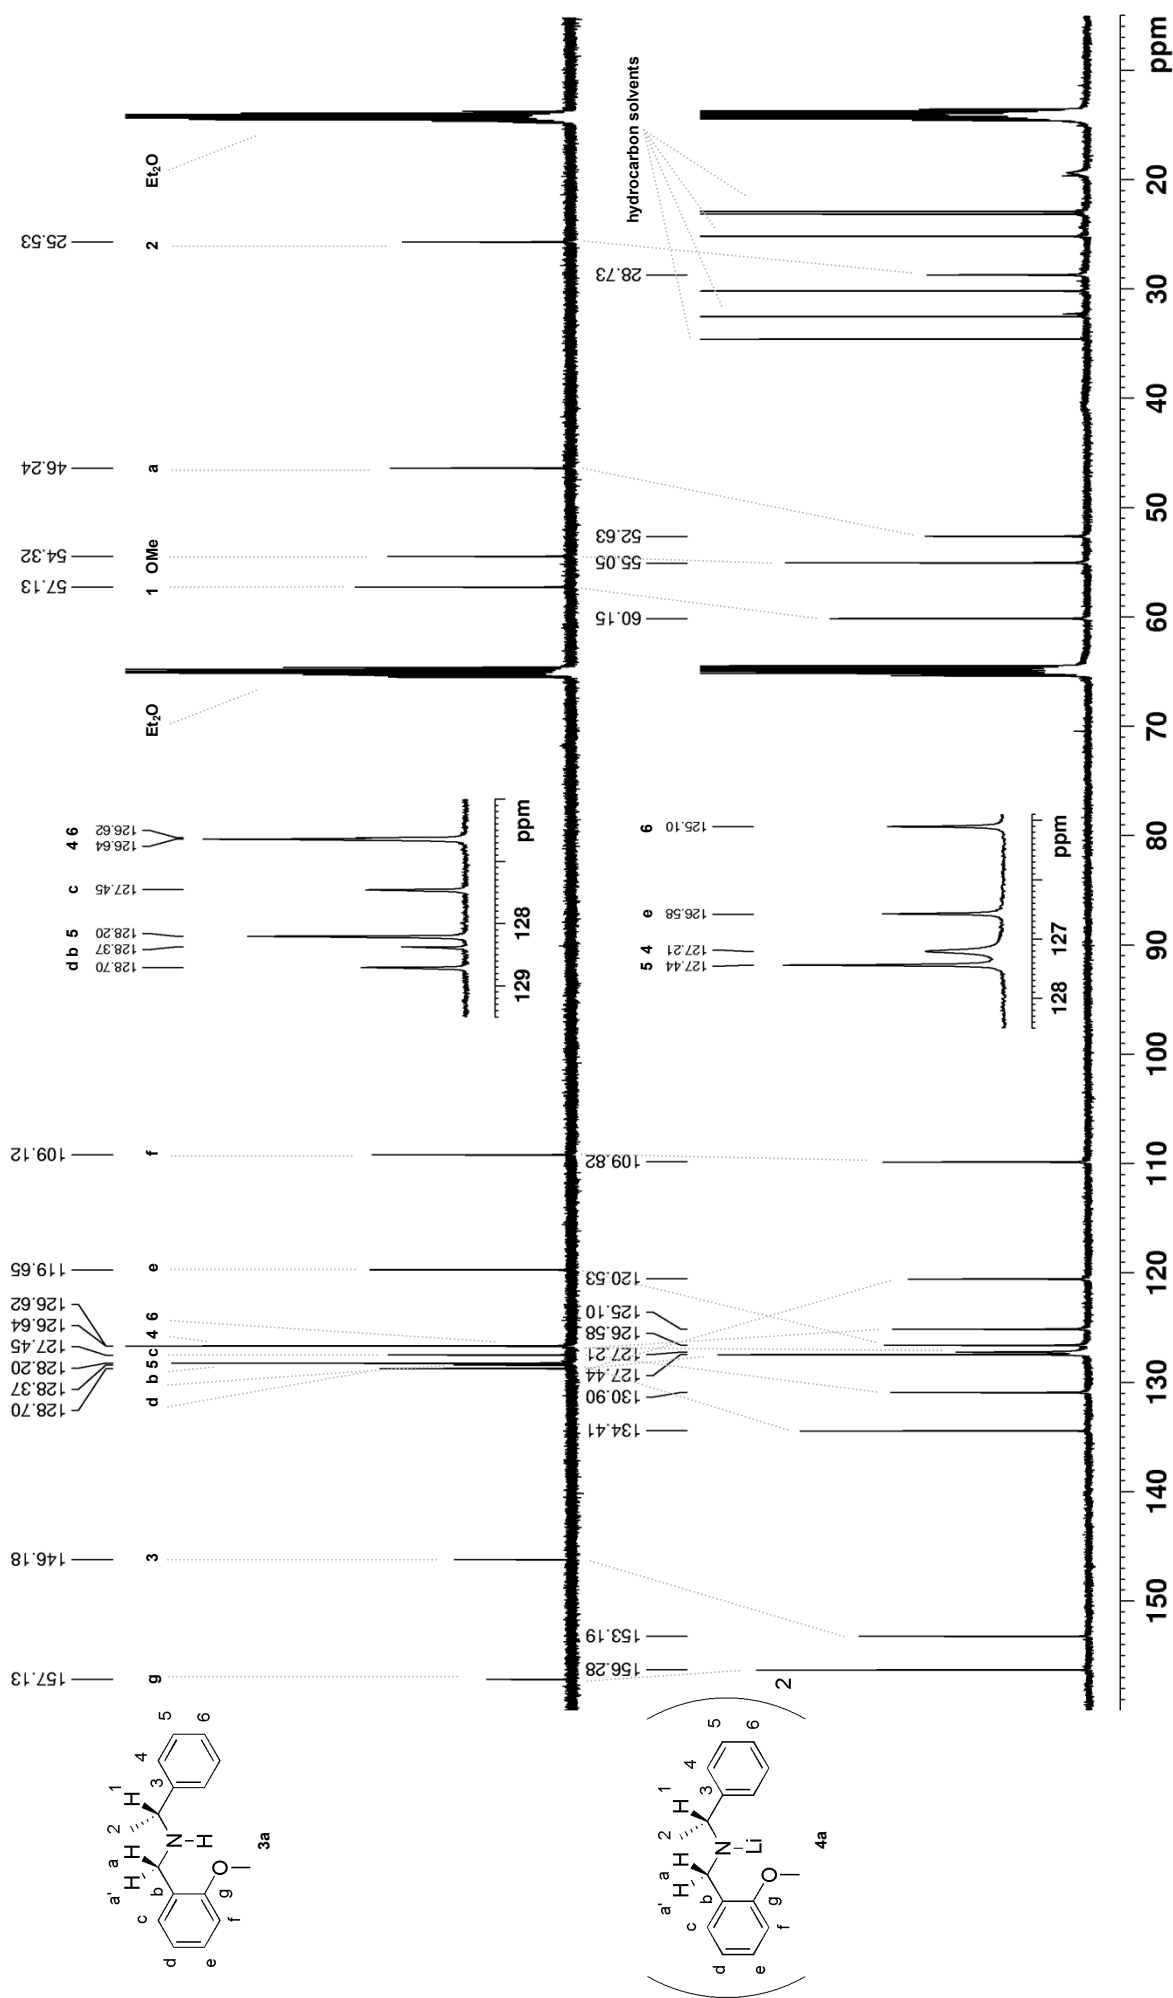

Figure S2.  $^{13}\text{C}\{^1\text{H}\}$  NMR spectra of **3a** (top) and **4a** (bottom) in  $\text{Et}_2\text{O}_{d10}$  at 195K

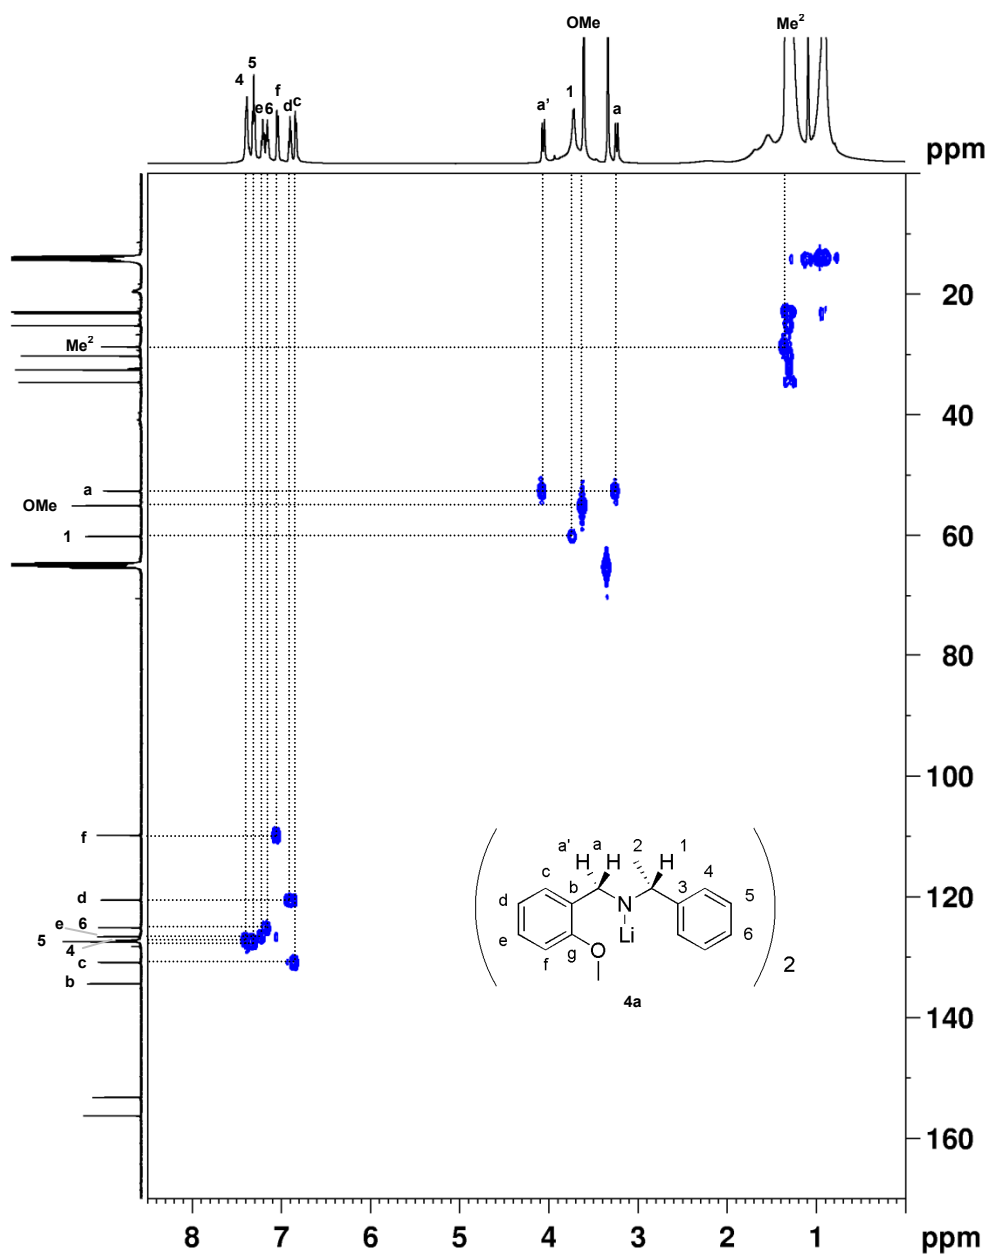

Figure S3.  $^1\text{H}$ ,  $^{13}\text{C}$ -HMQC spectrum of **4a** in  $\text{Et}_2\text{O}_{d10}$  at 195K

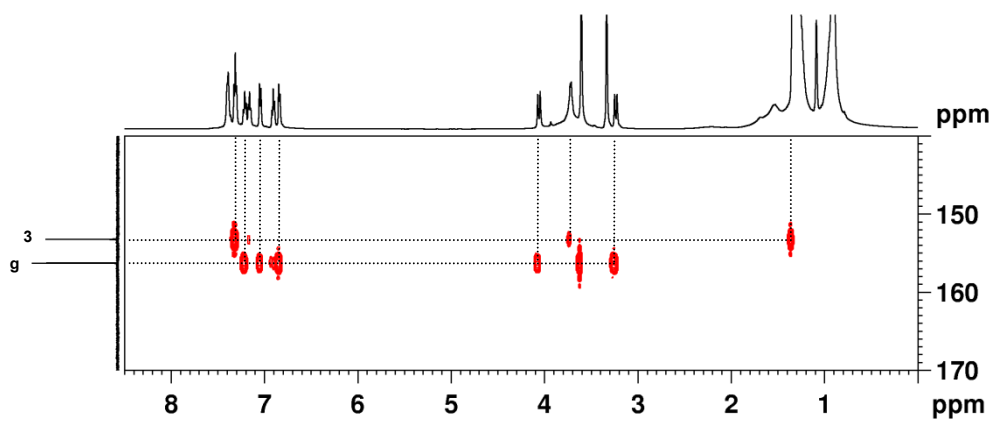

Figure S4.  $^1\text{H}$ ,  $^{13}\text{C}$ -HMBC spectrum of **4a** in  $\text{Et}_2\text{O}_{d10}$  at 195K

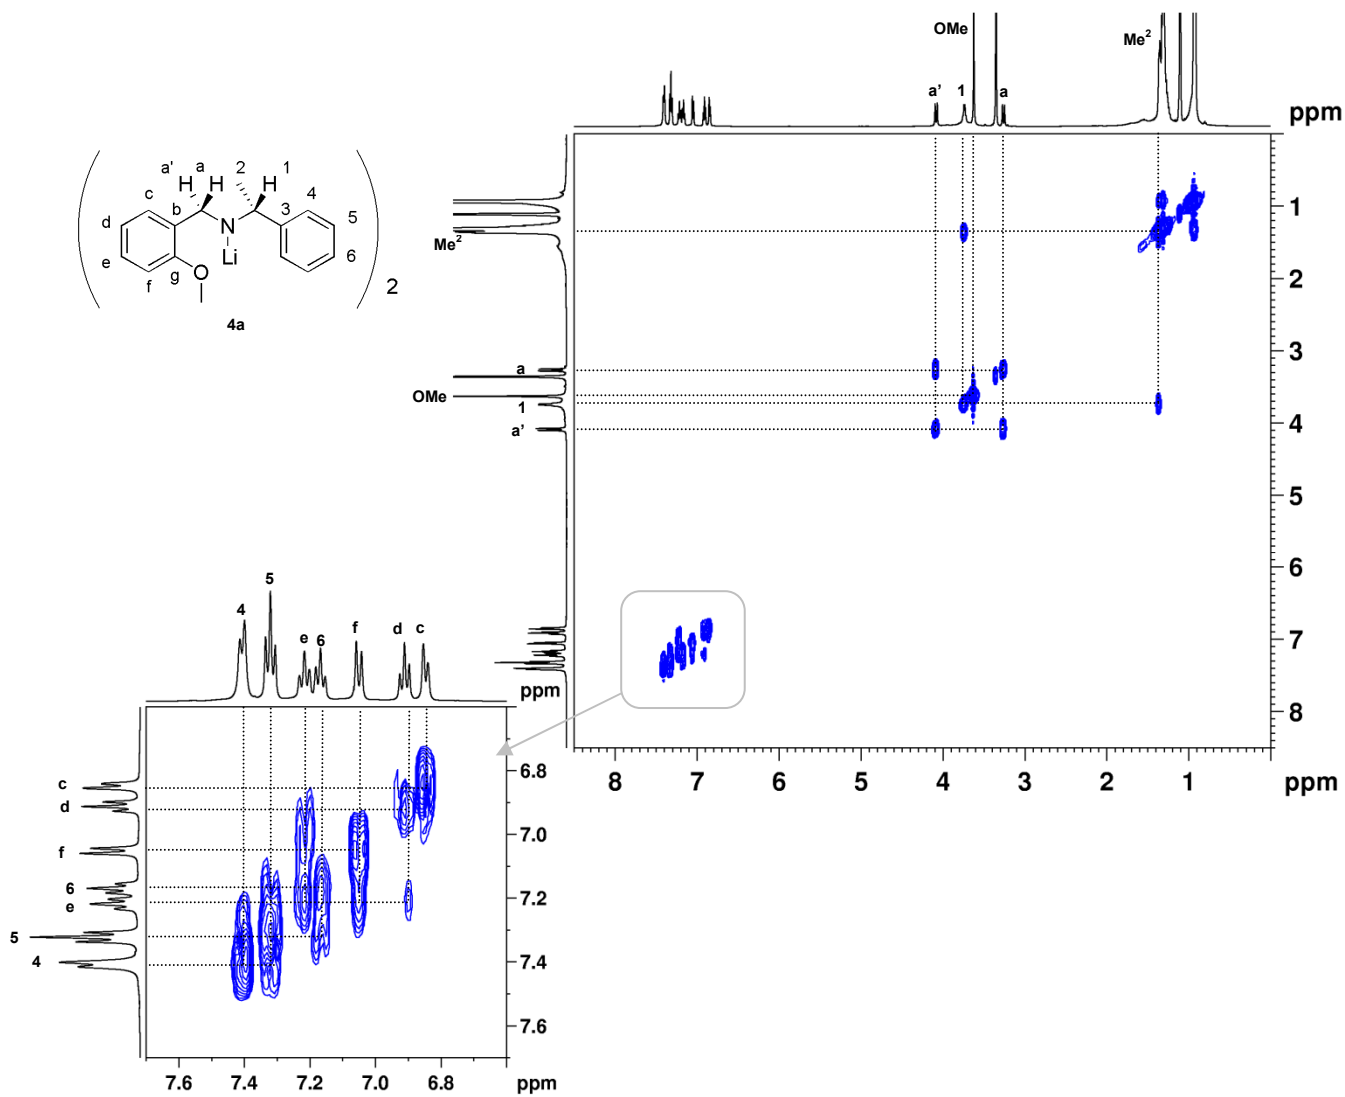

Figure S5.  $^1\text{H}, ^1\text{H}$ -COSY spectrum of **4a** in  $\text{Et}_2\text{O}_{d10}$  at 195K

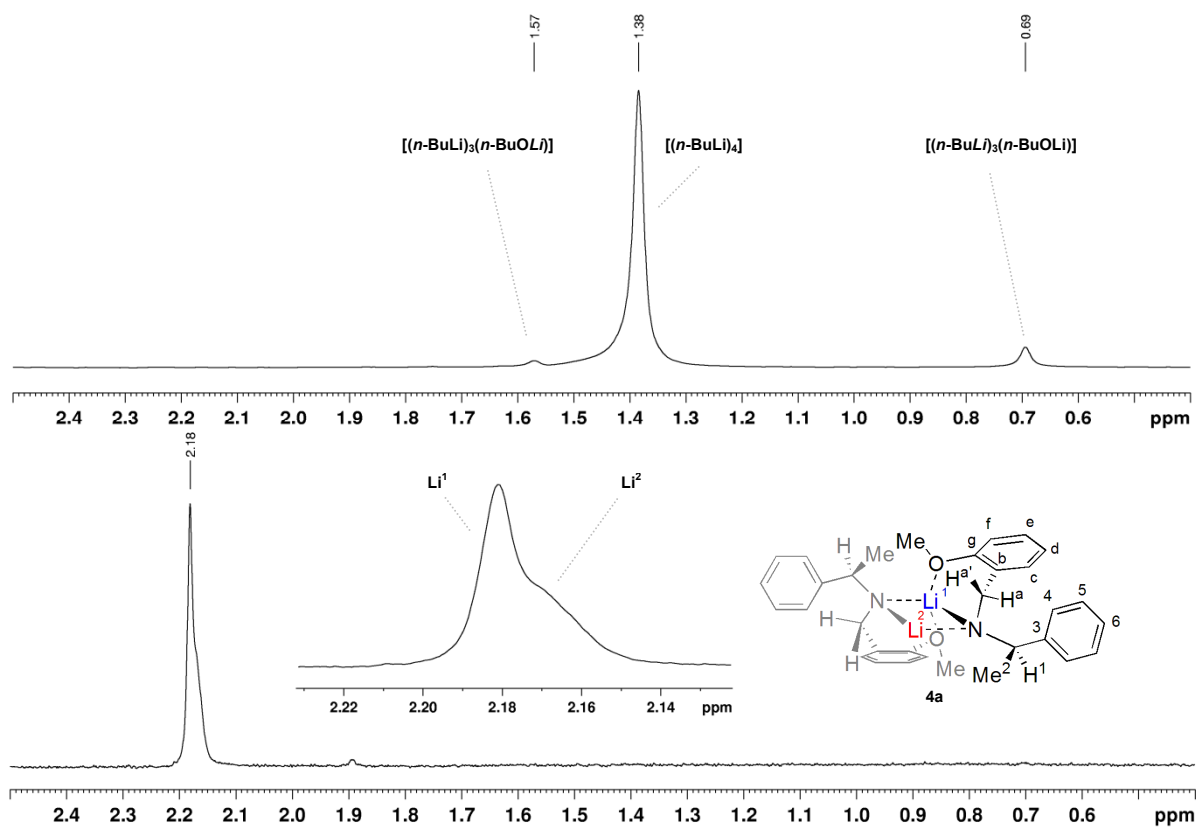

**Figure S6.**  ${}^6\text{Li}$  NMR spectra of  $n\text{-BuLi}$  (top) and **4a** (bottom) in  $\text{Et}_2\text{O}_{d10}$  at 195K

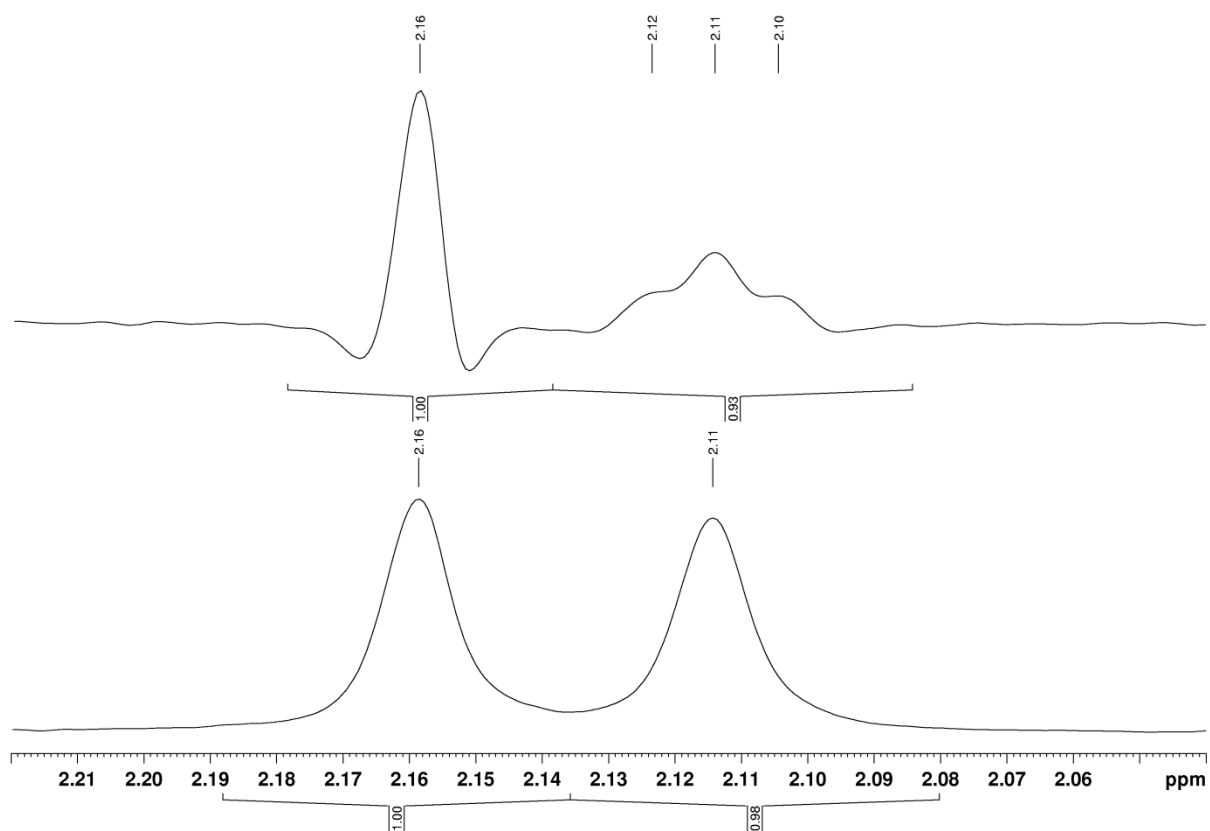

**Figure S7.**  ${}^6\text{Li}$  NMR spectra with resolution enhancement ( $\text{GB} = 0.1$ ,  $\text{LB} = -0.5$ ) (top) and proton  $\text{H}^1$  selective decoupling (bottom) of **4a** in  $\text{Et}_2\text{O}_{d10}$  at 250K

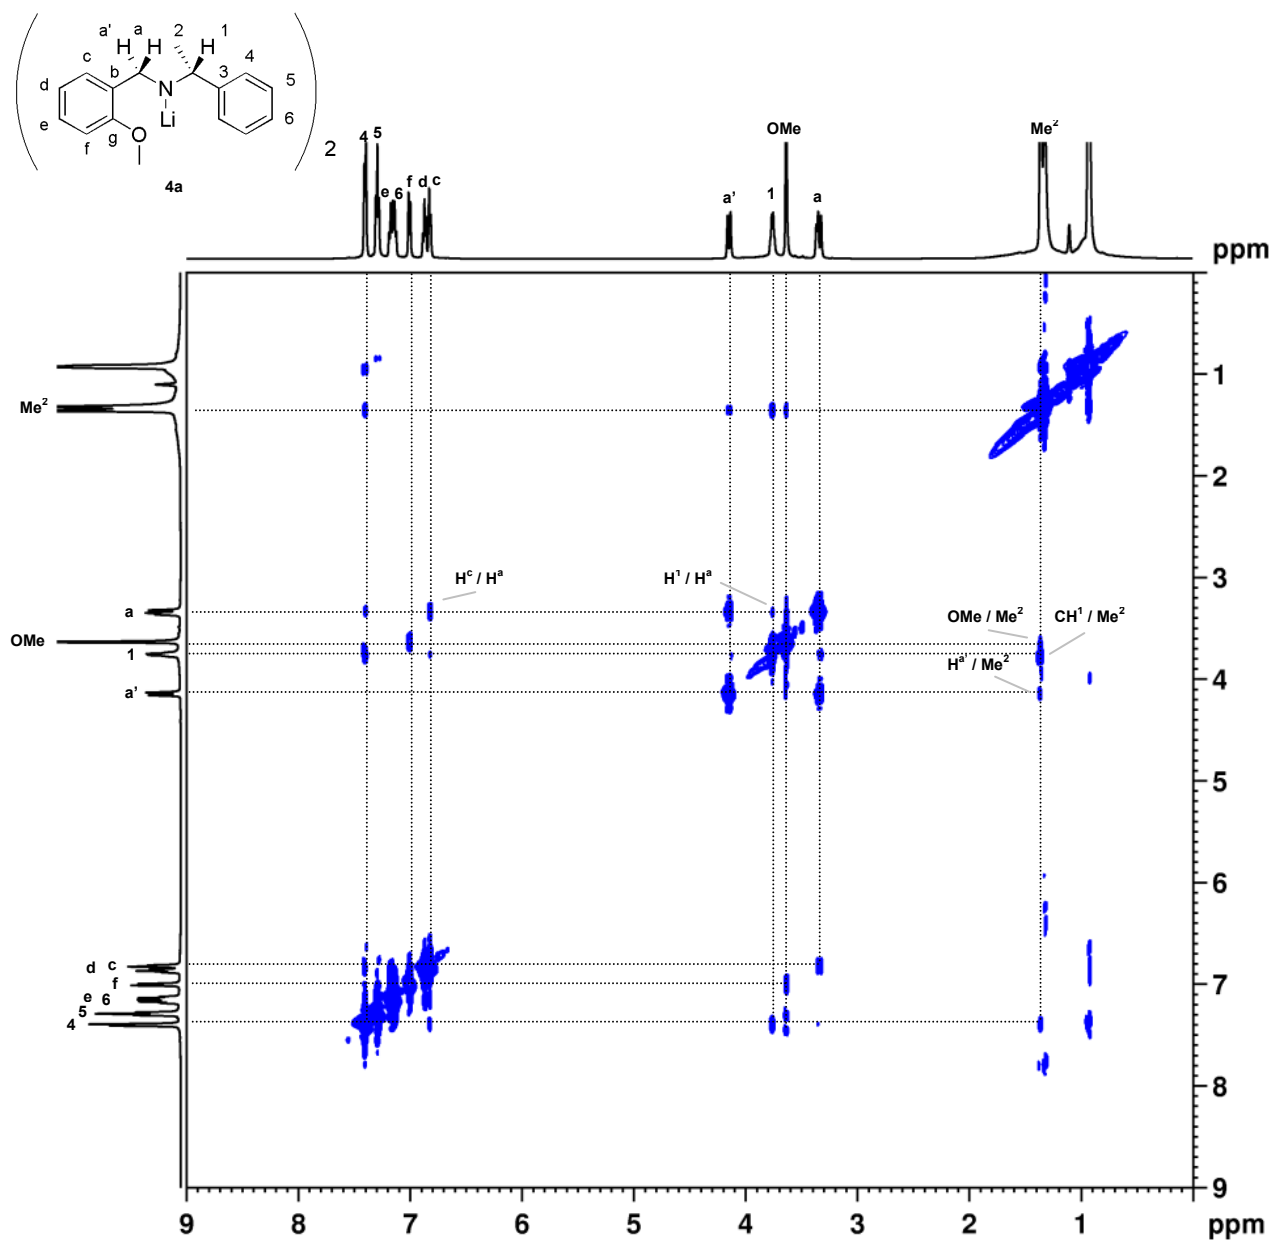

Figure S8.  $^1\text{H}$ ,  $^1\text{H}$ -NOESY (mixing time  $\tau_m = 0.60\text{s}$ ) spectrum of **4a** in  $\text{Et}_2\text{O}_{d10}$  at 250K.



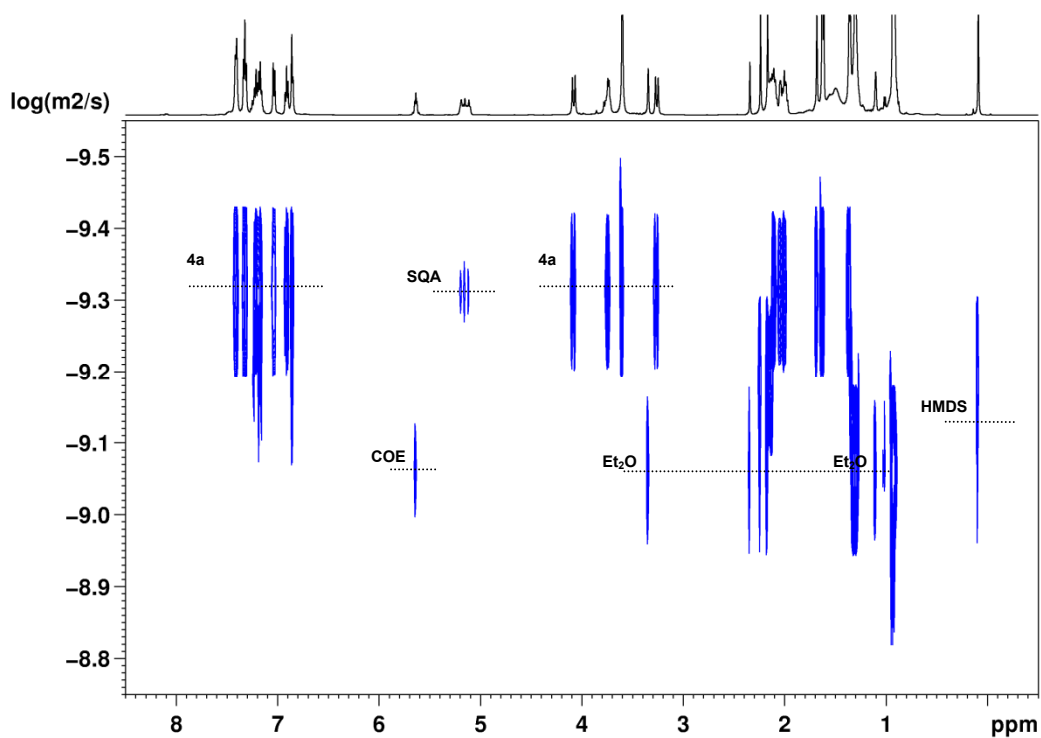

**Figure S9.**  $^1\text{H}$ -DOSY spectrum of **4a** in  $\text{Et}_2\text{O}_{d10}$  at 195K

**Figure S10.** Decay curves of  $^1\text{H}$ -DOSY for Internal References [COE (a), HMDS (b), SQA (c)] and **4a** (d) in  $\text{Et}_2\text{O}_{d10}$  at 195K

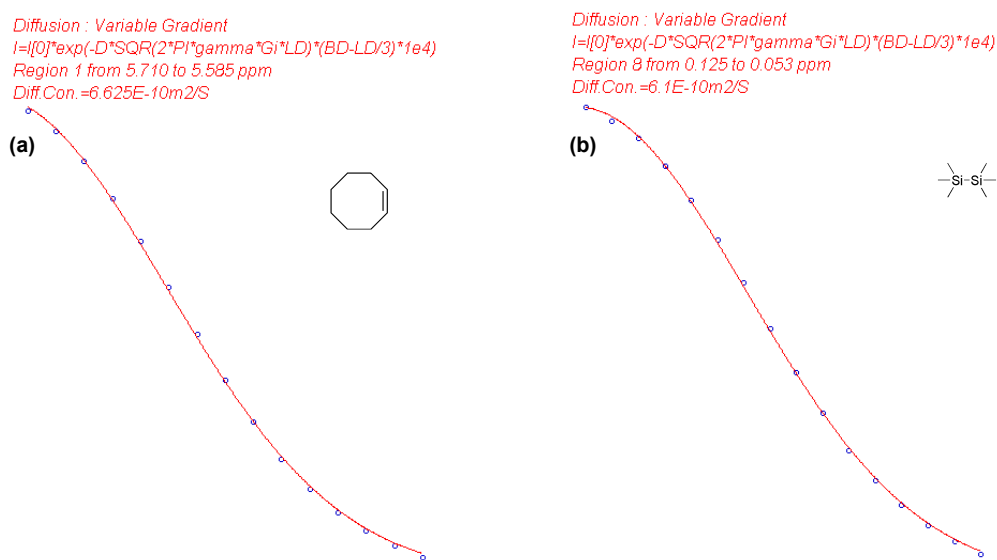

(Figure S10, continued)

Diffusion : Variable Gradient  
 $I = [0] \cdot \exp(-D \cdot \text{SQR}(2 \cdot \text{PI} \cdot \text{gamma} \cdot \text{GI} \cdot \text{LD}) \cdot (\text{BD} - \text{LD}/3) \cdot 1e4)$   
 Region 2 from 5.239 to 5.061 ppm  
 Diff.Con. = 4.502E-10 m<sup>2</sup>/S

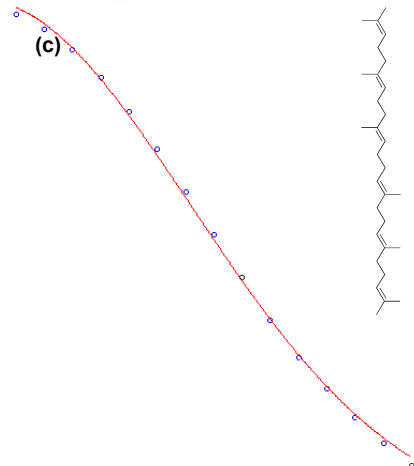

Diffusion : Variable Gradient  
 $I = [0] \cdot \exp(-D \cdot \text{SQR}(2 \cdot \text{PI} \cdot \text{gamma} \cdot \text{GI} \cdot \text{LD}) \cdot (\text{BD} - \text{LD}/3) \cdot 1e4)$   
 Region 4 from 3.665 to 3.549 ppm  
 Diff.Con. = 4.298E-10 m<sup>2</sup>/S

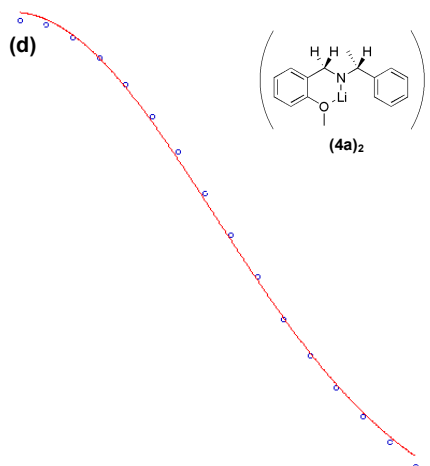

**Table S1** D-FW analyses of <sup>1</sup>H-DOSY data of **4a** in Et<sub>2</sub>O<sub>d10</sub> at 195K

| compound                        | FW (g mol <sup>-1</sup> ) | LogFW | D (m <sup>2</sup> s <sup>-1</sup> ) | logD   | predicted FW (g mol <sup>-1</sup> ) | Error (%) |
|---------------------------------|---------------------------|-------|-------------------------------------|--------|-------------------------------------|-----------|
| COE                             | 110,2                     | 2,042 | 6,63E-10                            | -9,178 | 110,2                               |           |
| HMDS                            | 146,4                     | 2,165 | 6,10E-10                            | -9,214 | 146,4                               |           |
| SQA                             | 410,7                     | 2,613 | 4,50E-10                            | -9,346 | 410,7                               |           |
| Et <sub>2</sub> O <sub>d9</sub> | 68,7                      | 1,837 | 7,61E-10                            | -9,118 | 83,2                                | -20.8     |
| <b>4a</b>                       | 479,8                     | 2,681 | 4,29E-10                            | -9,367 | 494.5 <sup>a</sup>                  | -2.5      |

<sup>a</sup>: the predicted FW is referred to an unsolvated dimer [(**4a**)<sub>2</sub>].

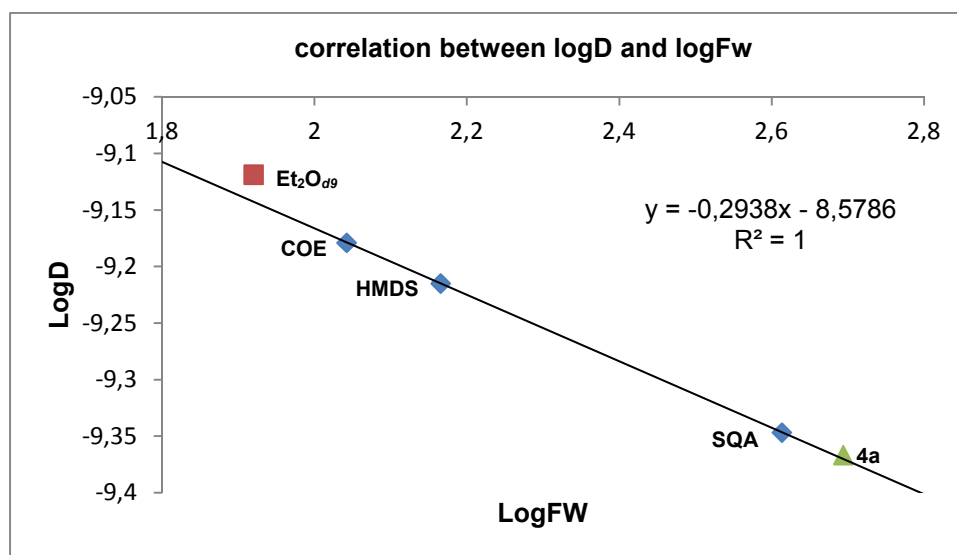

### 3. NMR spectra of amine 3a and amide 4a in THF-*d*<sub>8</sub>

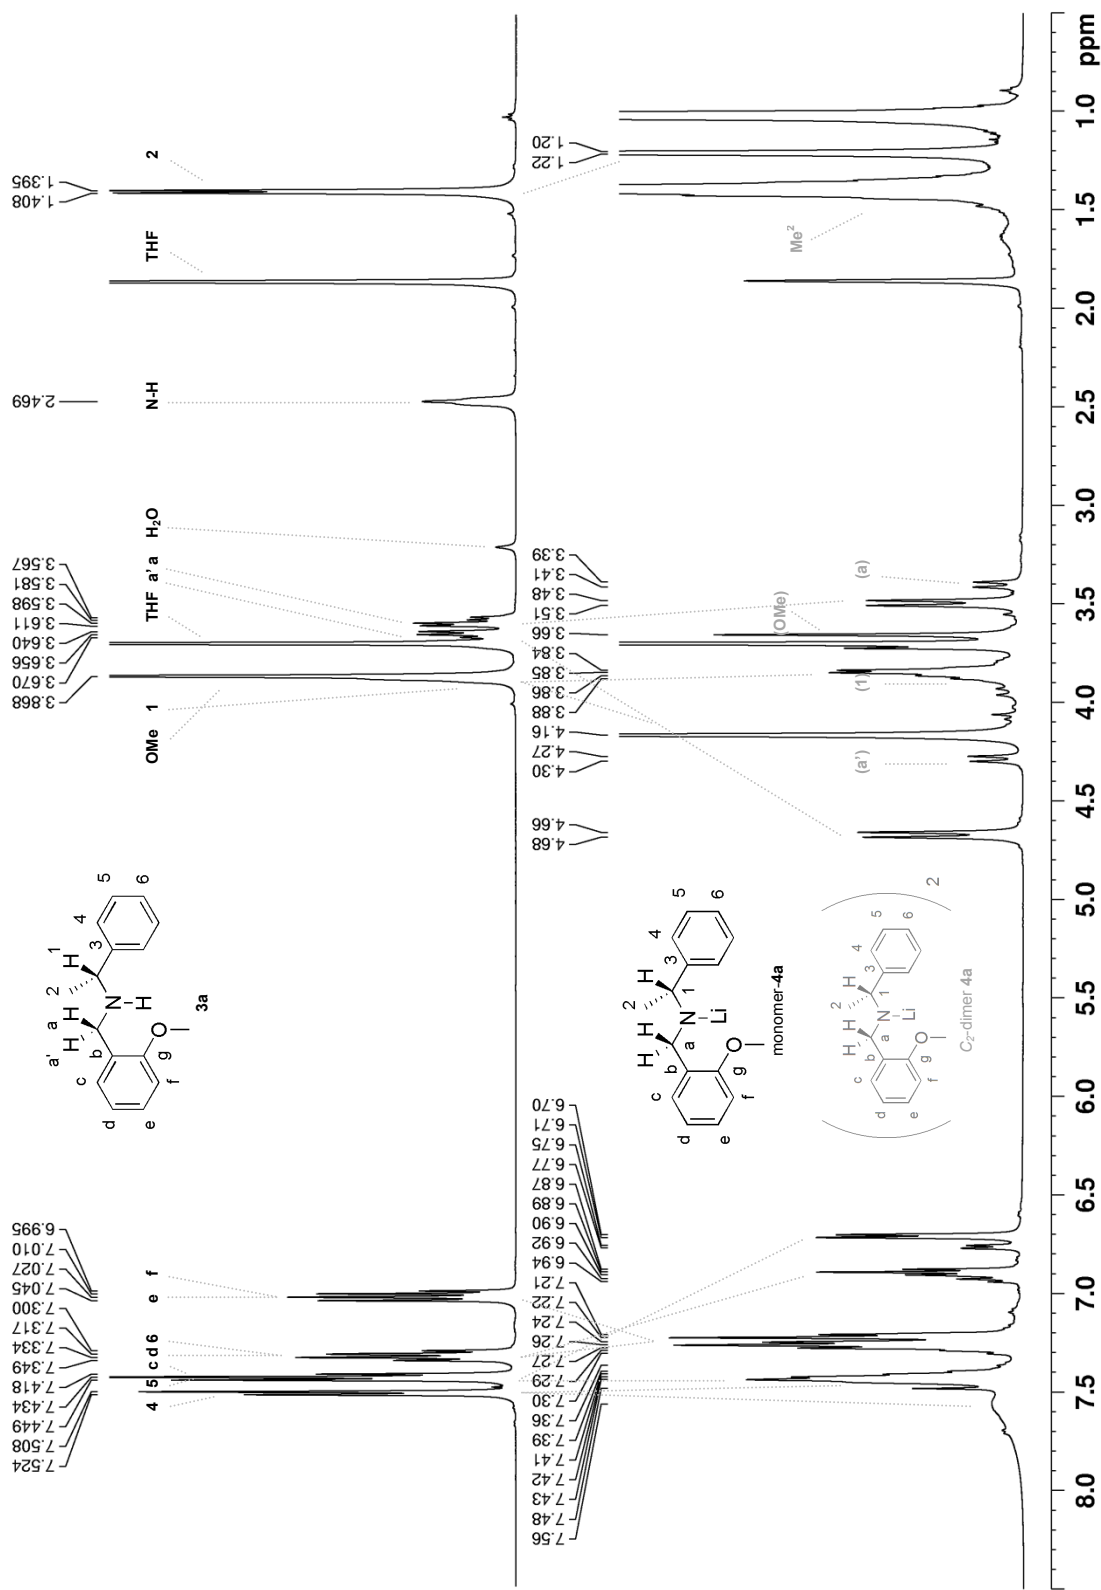

Figure S11. <sup>1</sup>H NMR spectra of 3a (top) and 4a (bottom) in THF-*d*<sub>8</sub> at 195K

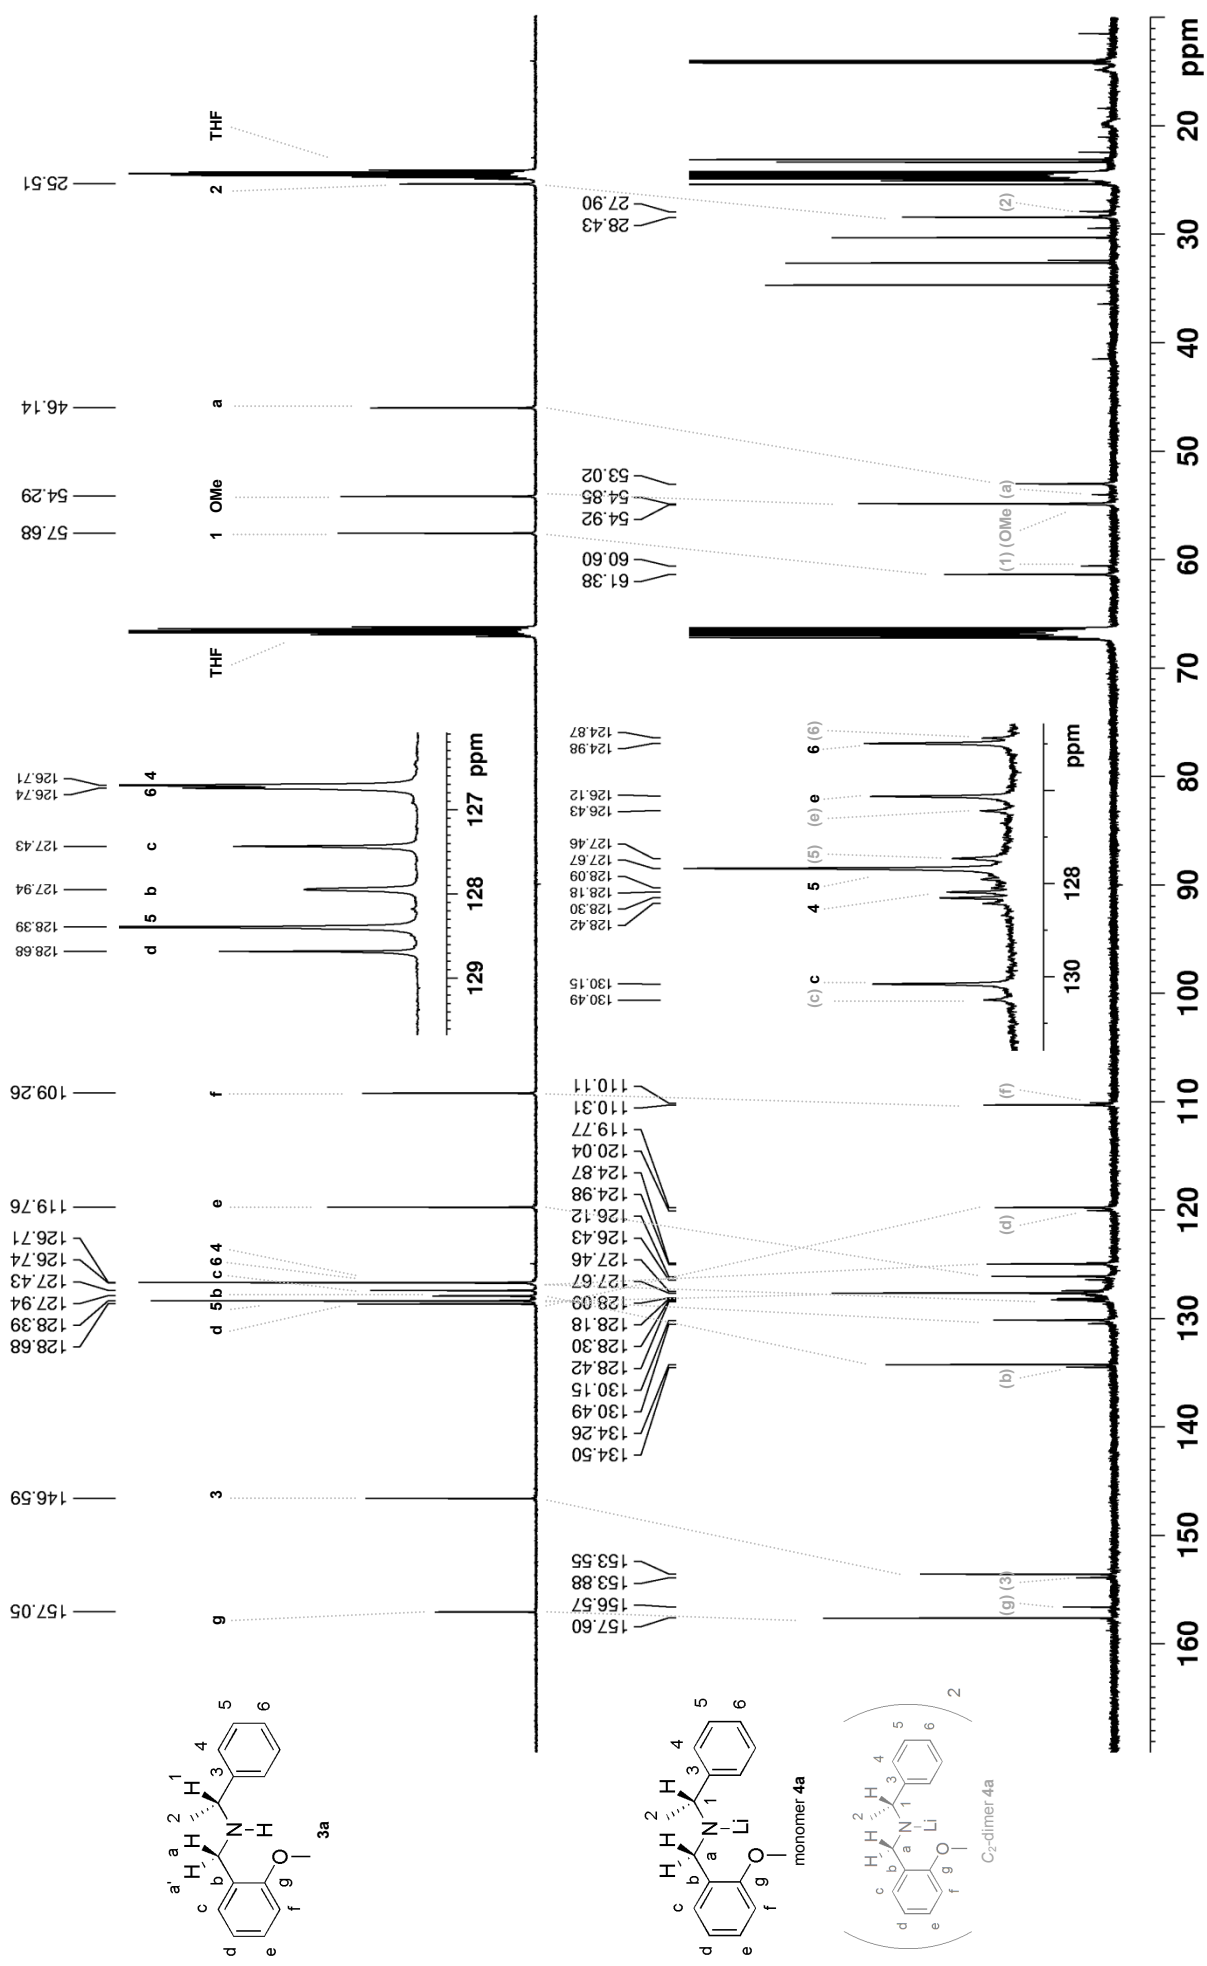

Figure S12.  $^{13}\text{C}\{^1\text{H}\}$  NMR spectra of **3a** (top) and **4a** (bottom) in  $\text{THF-}d_8$  at 195K

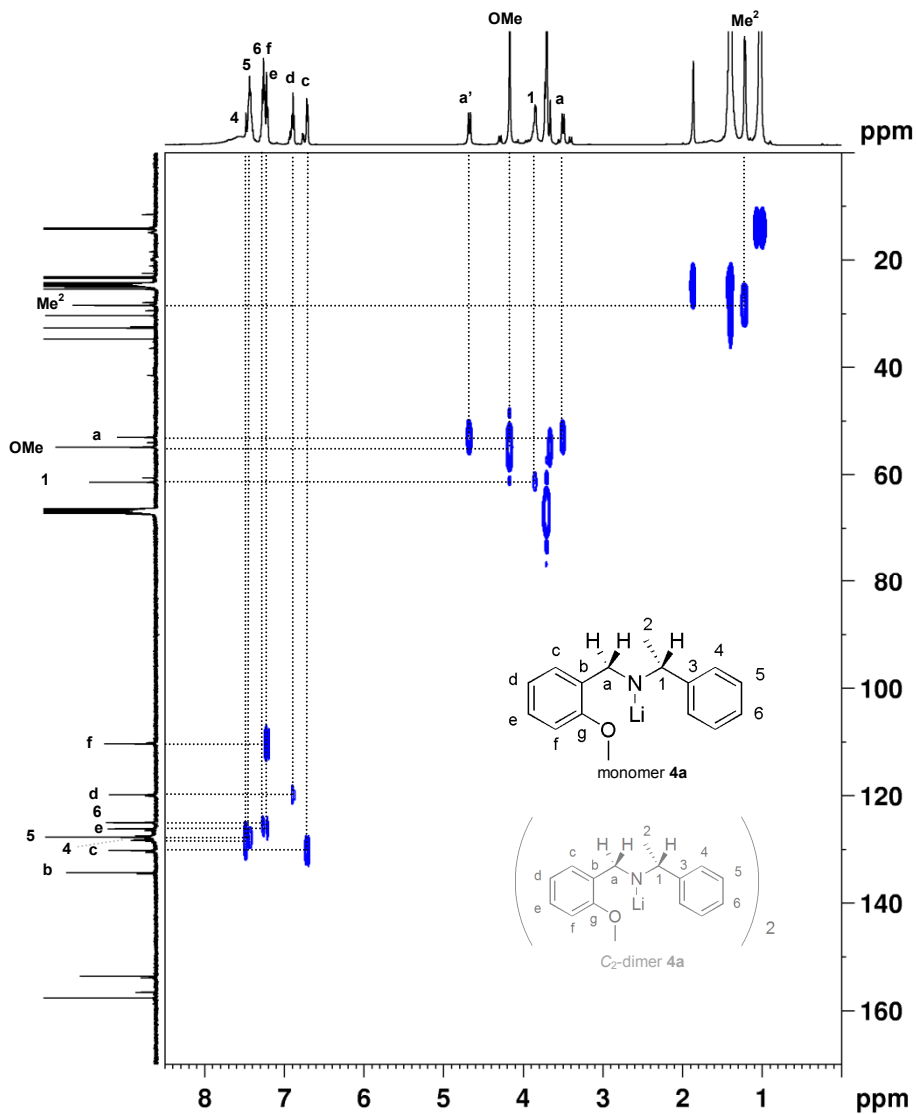

Figure S13.  $^1\text{H}$ ,  $^{13}\text{C}$ -HMQC spectrum of **4a** in  $\text{THF}_{d8}$  at 195K

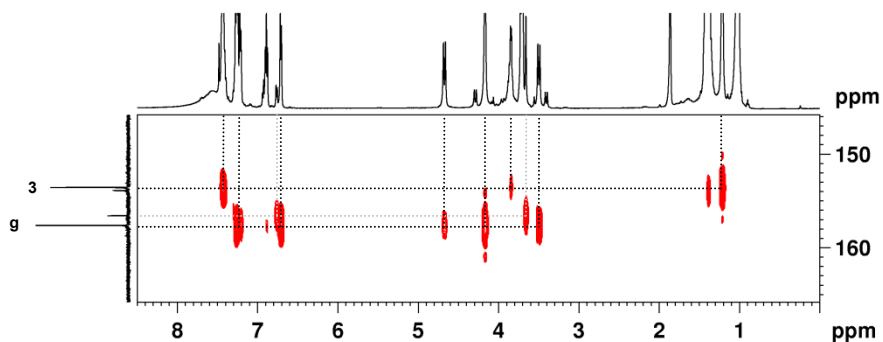

Figure S14.  $^1\text{H}$ ,  $^{13}\text{C}$ -HMBC spectrum of **4a** in  $\text{THF}_{d8}$  at 195K

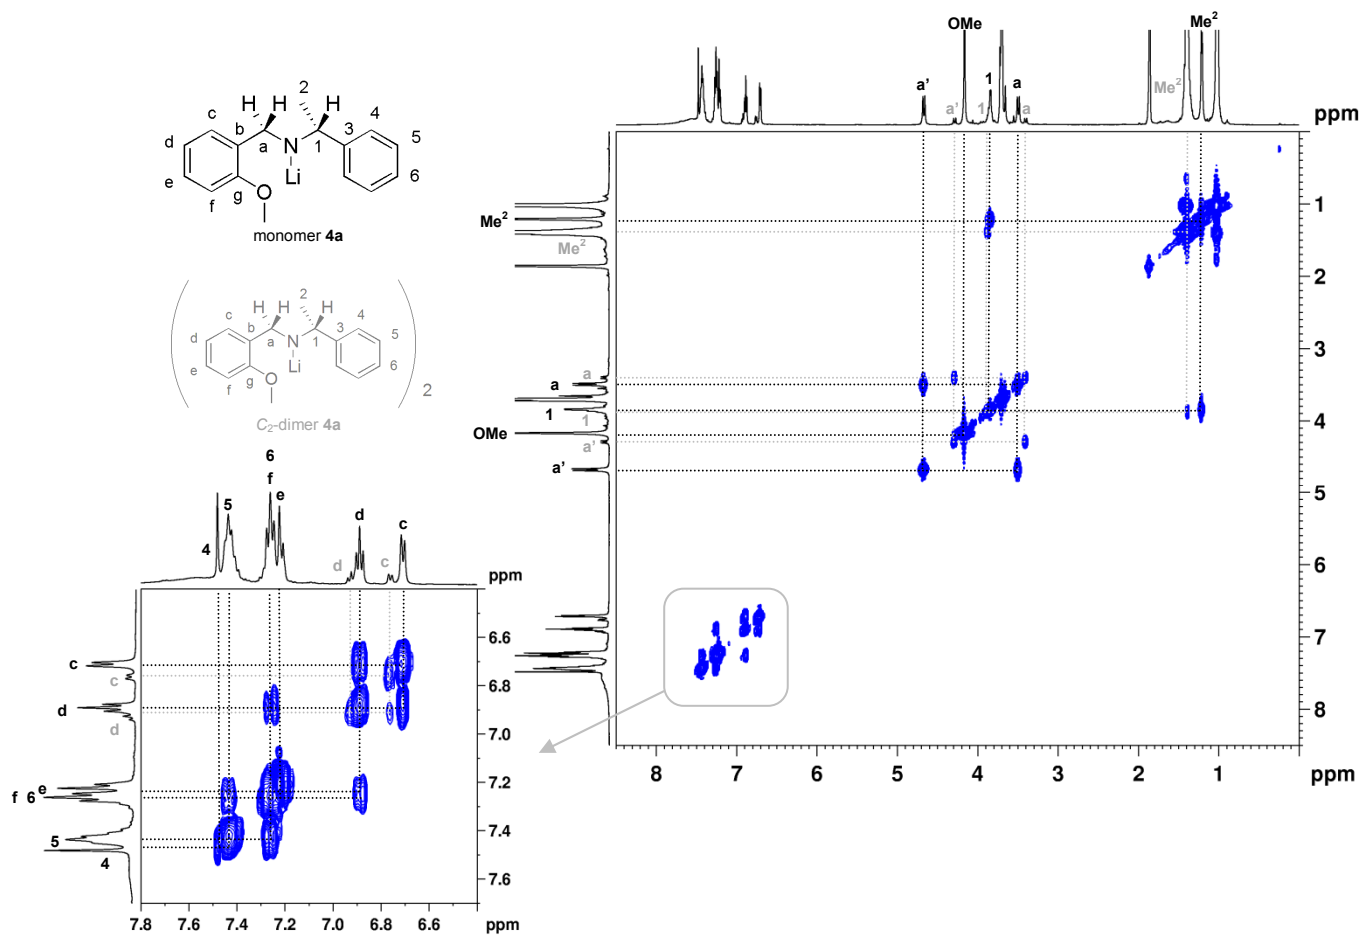

Figure S15.  $^1\text{H}$ ,  $^1\text{H}$ -COSY spectrum of **4a** in  $\text{THF}_{d8}$  at 195K

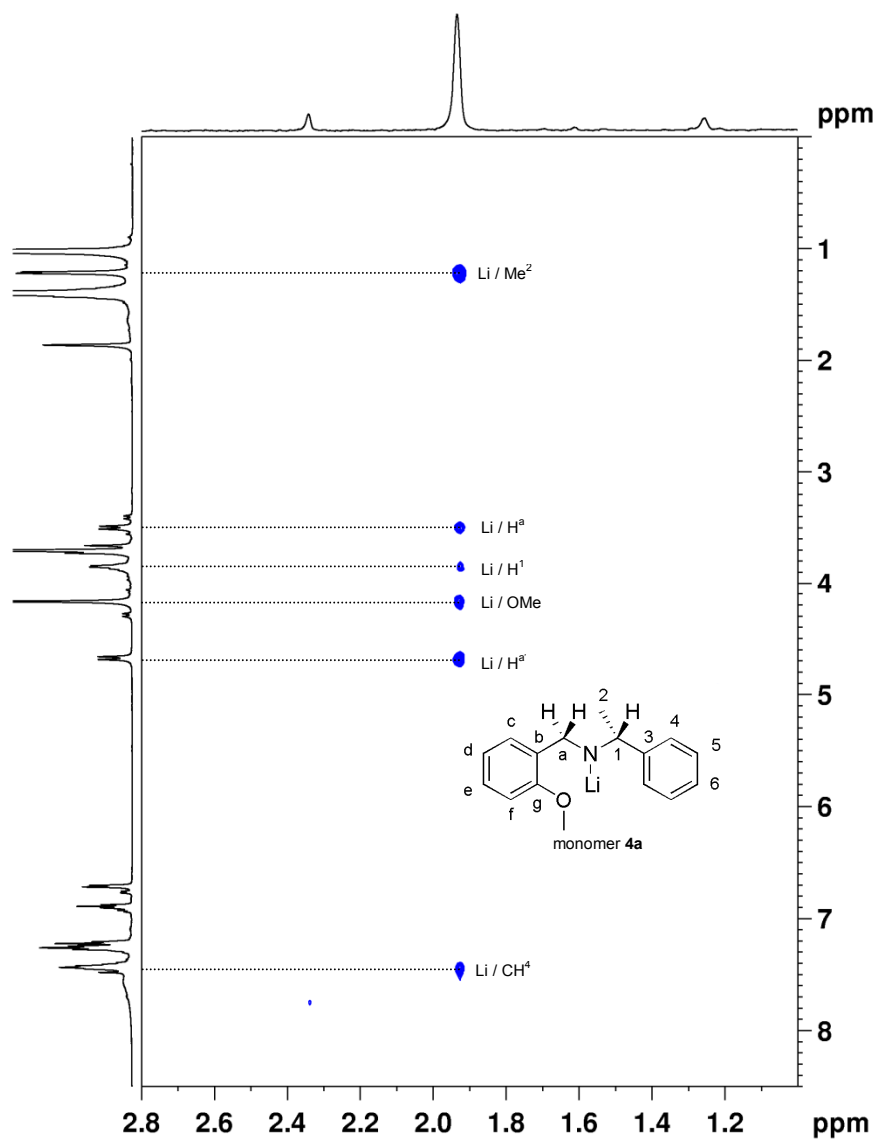

**Figure S16.**  ${}^6\text{Li}$ ,  ${}^1\text{H}$ -HOESY spectrum (mixing time  $\tau_m = 1.44\text{s}$ ) of **4a** in  $\text{THF}_{d8}$  at 195K

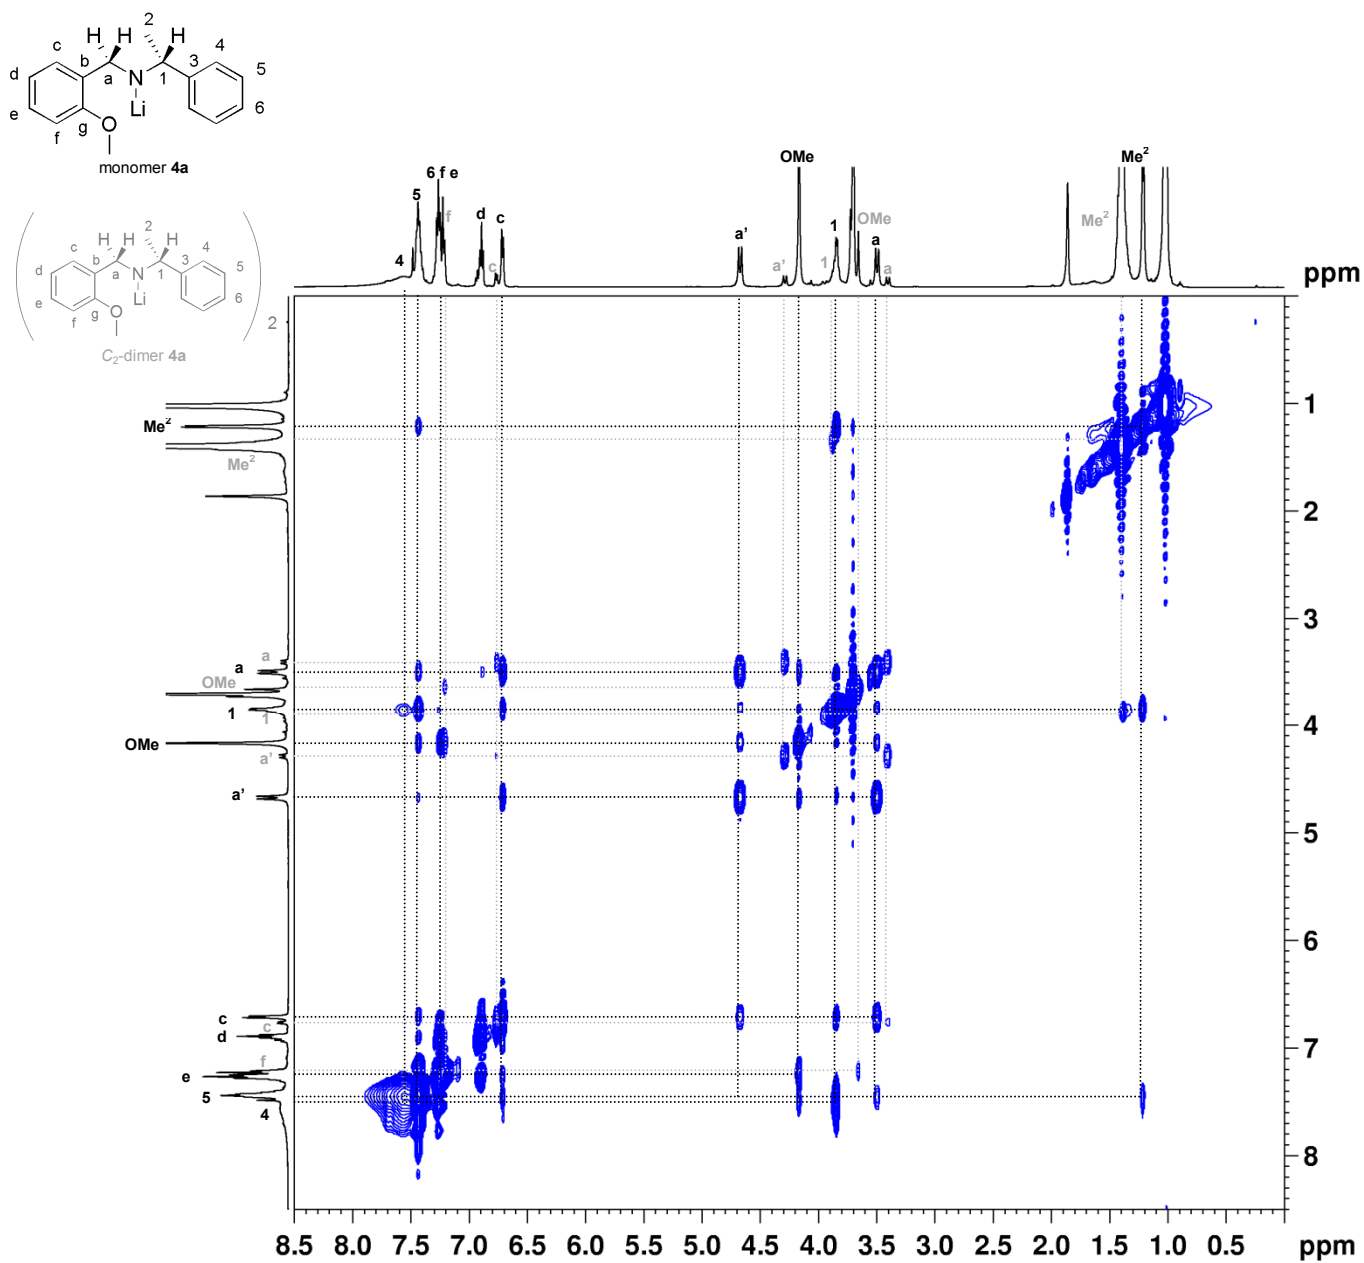

**Figure S17.**  $^1\text{H}$ ,  $^1\text{H}$ -NOESY spectrum (mixing time  $\tau_m = 0.60\text{s}$ ) of **4a** in  $\text{THF}_{d8}$  at 195K



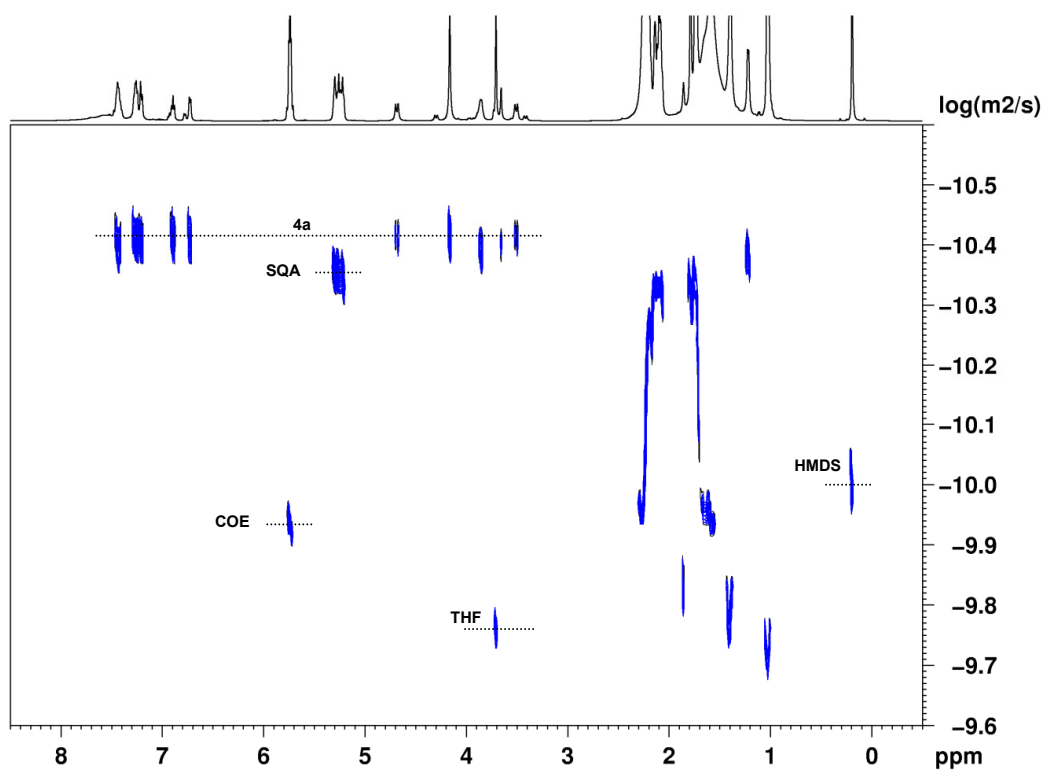

**Figure S18.**  $^1\text{H}$ -DOSY spectrum of **4a** in  $\text{THF}_{d8}$  at 195K

**Figure S19.** Decay curves of  $^1\text{H}$ -DOSY for Internal References [COE (a), HMDS (b), SQA (c)], monomer **4a** (d) and  $\text{C}_2$ -dimer **4a** (e) in  $\text{THF}_{d8}$  at 195K

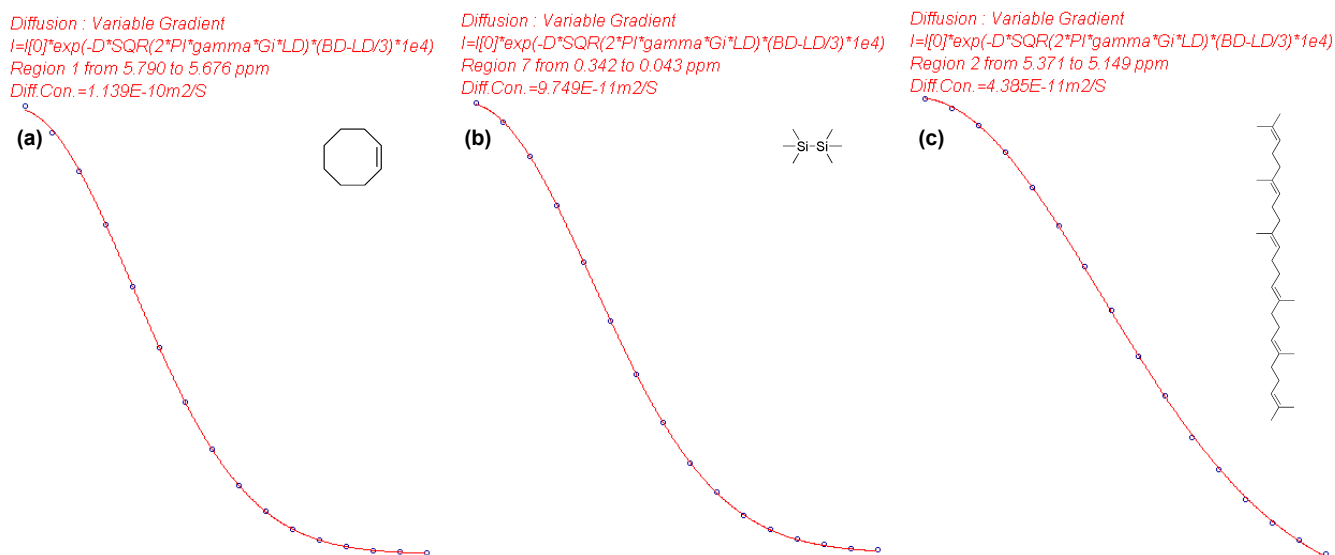

(Figure S19, continued)

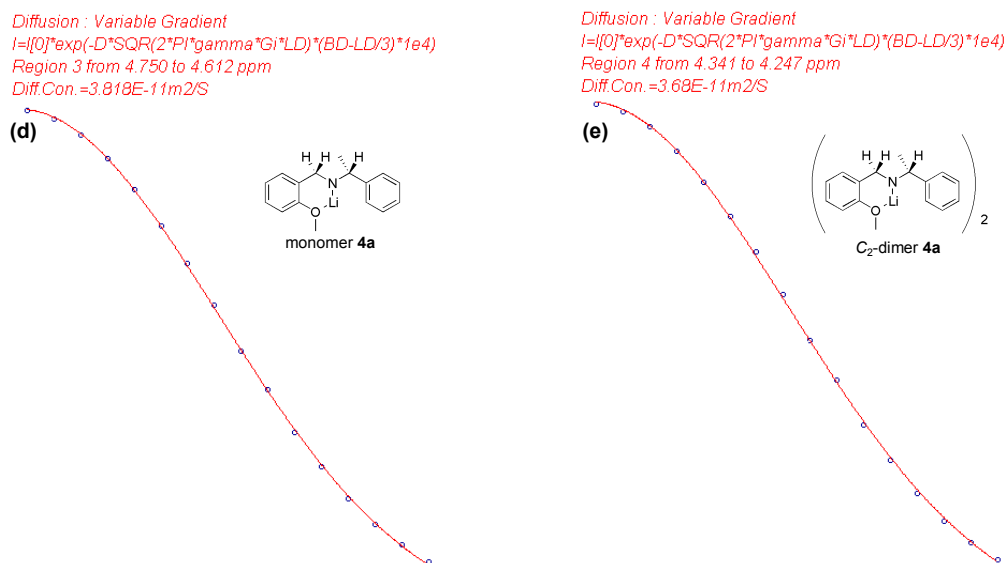

**Table S2.** D-FW analyses of <sup>1</sup>H-DOSY data of **4a** in THF<sub>d8</sub> at 195K

| compound                        | FW (g mol <sup>-1</sup> ) | LogFW | D (m <sup>2</sup> s <sup>-1</sup> ) | logD    | predicted FW (g mol <sup>-1</sup> ) | Error (%) |
|---------------------------------|---------------------------|-------|-------------------------------------|---------|-------------------------------------|-----------|
| COE                             | 110,2                     | 2,042 | 1,14E-10                            | -9,943  | 110,2                               |           |
| HMDS                            | 146,4                     | 2,165 | 9,75E-11                            | -10,011 | 146,4                               |           |
| SQA                             | 410,7                     | 2,613 | 4,39E-11                            | -10,358 | 410,7                               |           |
| THF <sub>d7</sub>               | 69,040                    | 1,839 | 1,65E-10                            | -9,783  | 79,1                                | -20.8     |
| monomer <b>4a</b>               | 500, 0                    | 2,699 | 3,82E-11                            | -10,418 | 484,7 <sup>a</sup>                  | 3.1       |
| C <sub>2</sub> -dimer <b>4a</b> | 525,4                     | 2,720 | 3,68E-11                            | -10,434 | 494.5 <sup>b</sup>                  | 5.9       |
| C <sub>2</sub> -dimer <b>4a</b> | 525,4                     | 2,720 | 3,68E-11                            | -10,434 | 573.7 <sup>c</sup>                  | -9.2      |

<sup>a</sup>: the predicted FW is referred to a trisolvated monomer [(**4a**)+3THF]. <sup>b</sup>: the predicted FW is referred to an unsolvated dimer [(**4a**)<sub>2</sub>]. <sup>c</sup>: the predicted FW is referred to a monosolvated dimer [(**4a**)<sub>2</sub>+THF].

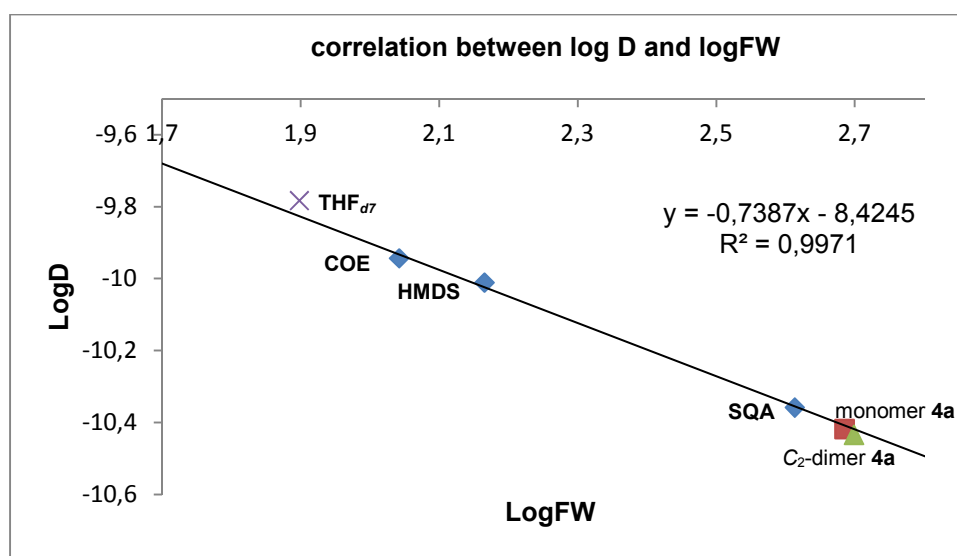

4. NMR spectra of 4a/*n*-BuLi complex in Et<sub>2</sub>O<sub>110</sub> and THF<sub>48</sub>

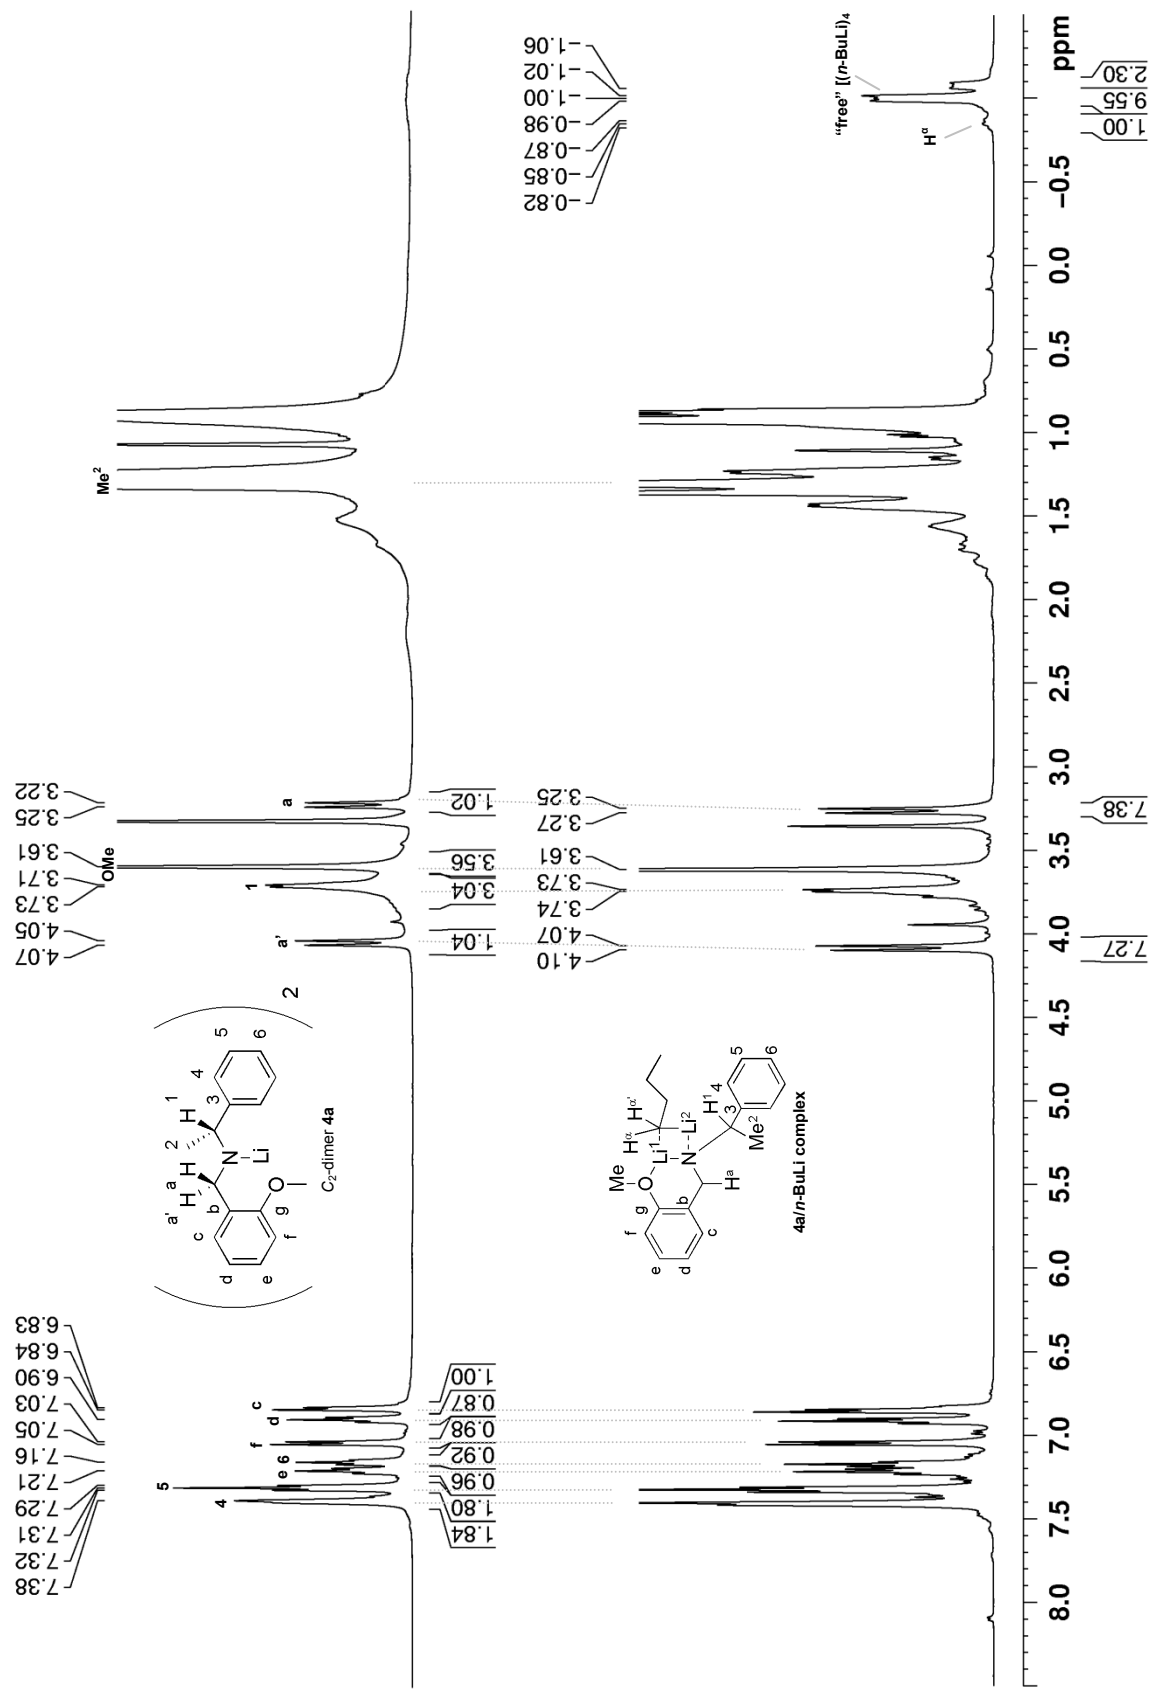

Figure S20. <sup>1</sup>H NMR spectra of 4a (top) and 4a + *n*-BuLi (bottom) in Et<sub>2</sub>O<sub>110</sub> at 195K

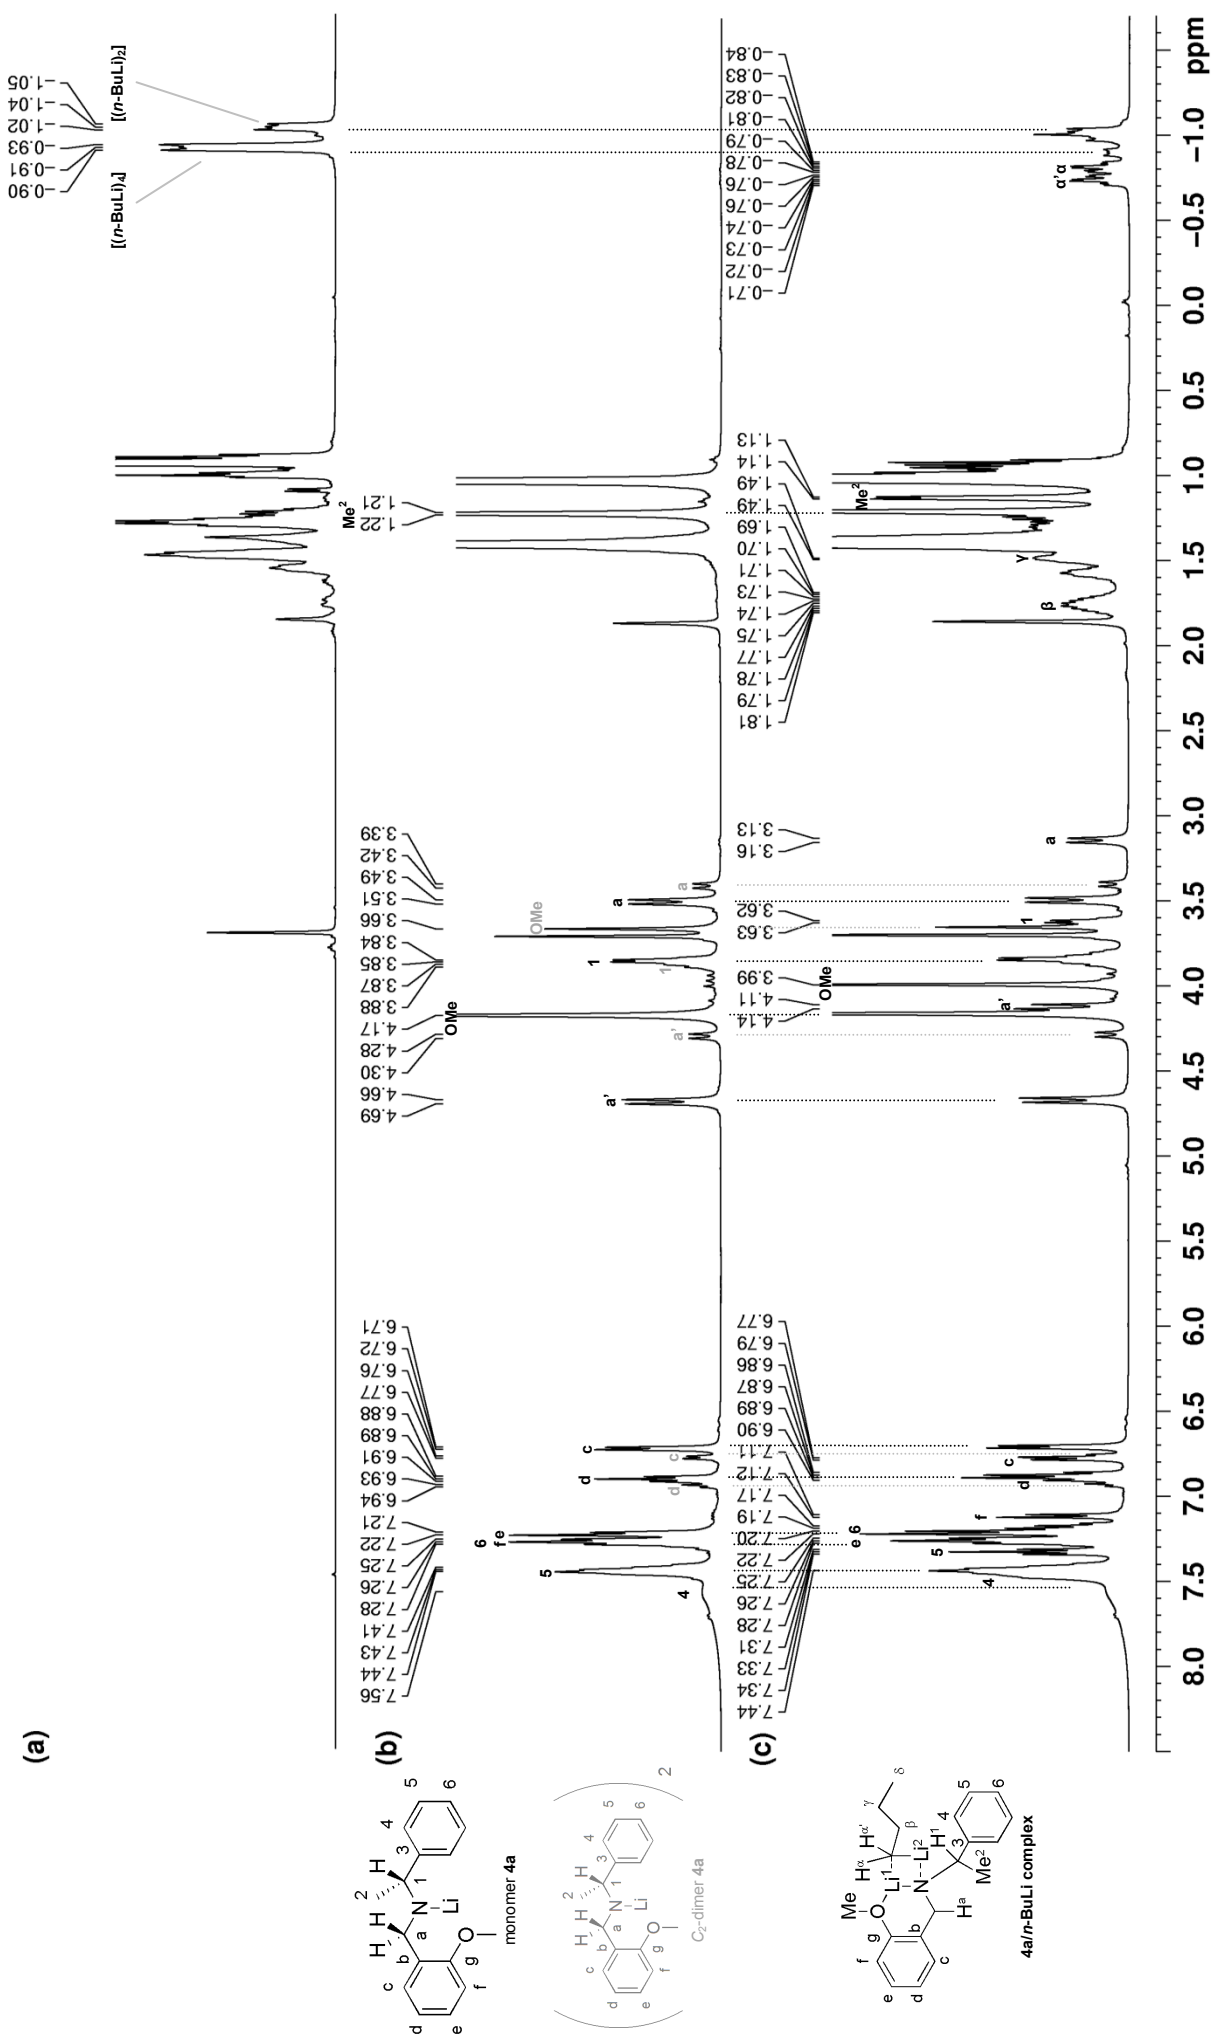

**Figure S21.**  $^1\text{H}$  NMR spectra of  $n\text{-BuLi}$  (a), **4a** (b) and **4a** +  $n\text{-BuLi}$  (c) in  $\text{THF-}d_8$  at 195K

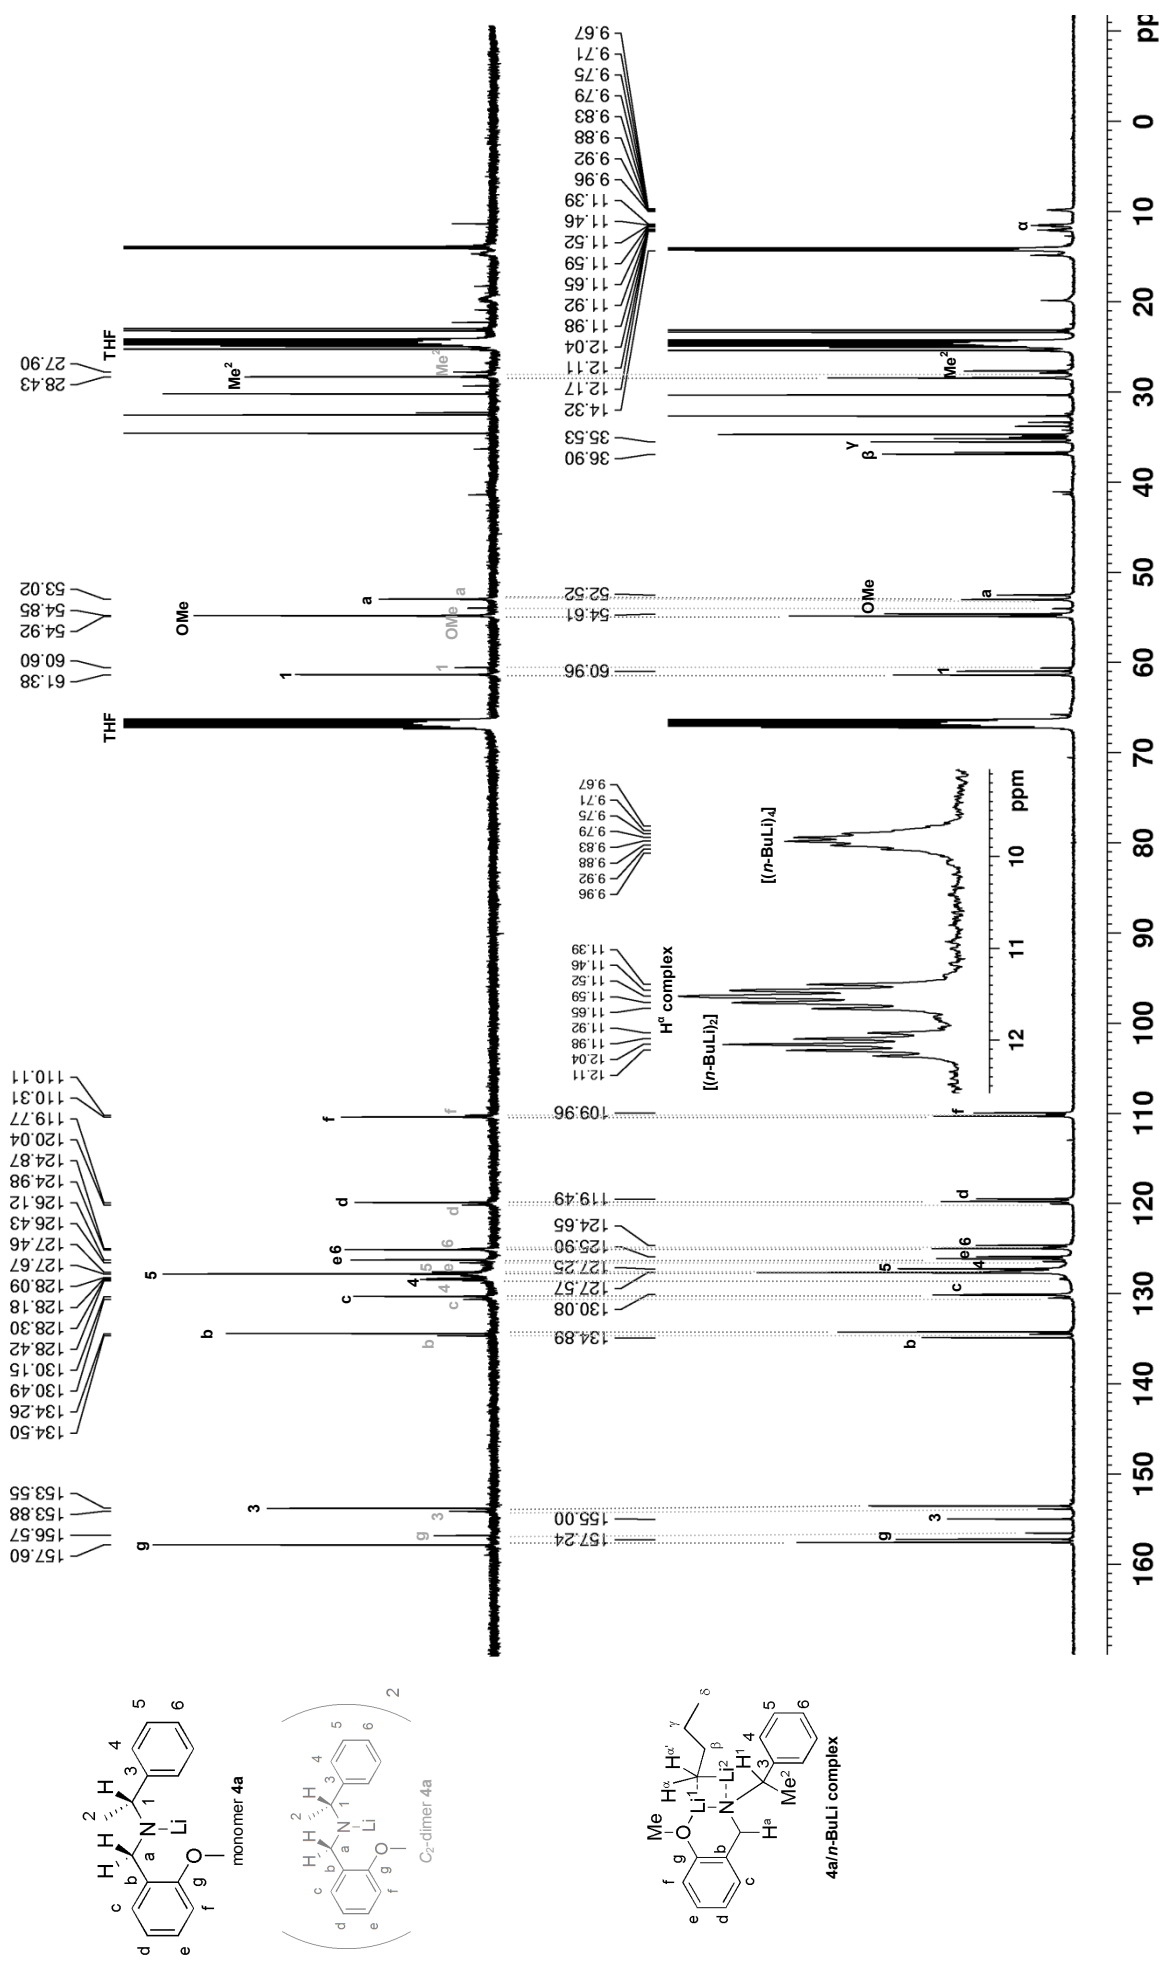

Figure S22.  $^{13}\text{C}\{^1\text{H}\}$  NMR spectra of **4a** (top) and **4a** + *n*-BuLi (bottom) in THF- $d_8$  at 195K

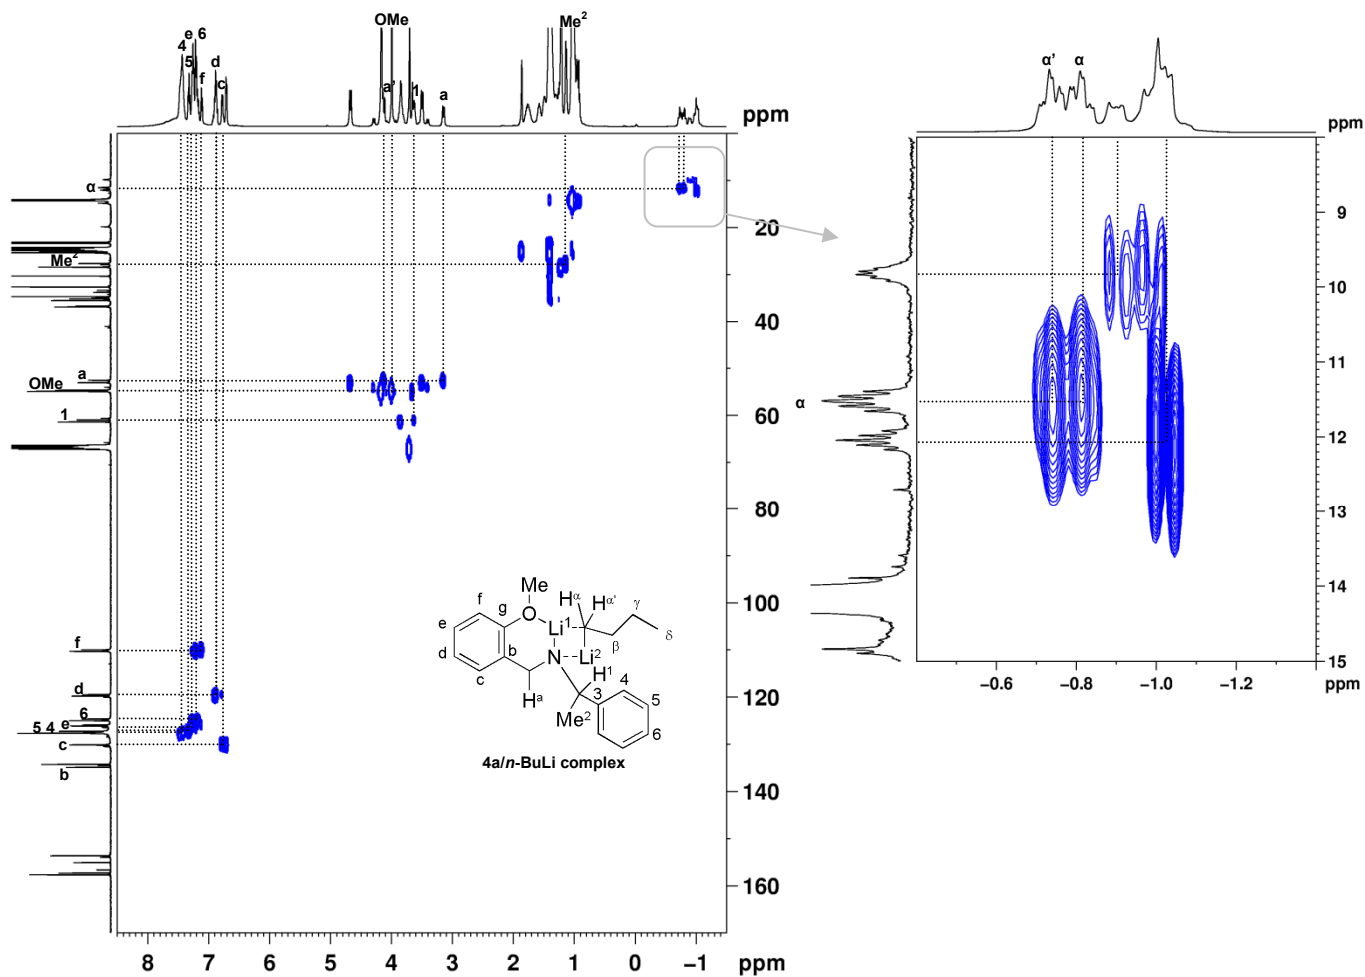

Figure S23.  $^1\text{H}$ ,  $^{13}\text{C}$ -HMQC spectrum of **4a** + *n*-BuLi in  $\text{THF}_{d8}$  at 195K

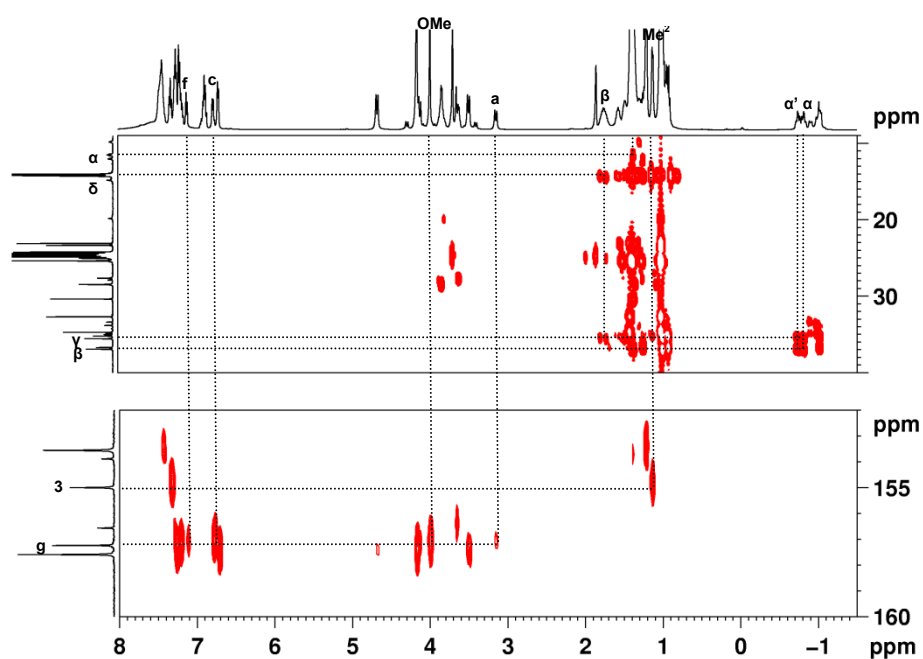

Figure S24.  $^1\text{H}$ ,  $^{13}\text{C}$ -HMBC spectrum of **4a** + *n*-BuLi in  $\text{THF}_{d8}$  at 195K

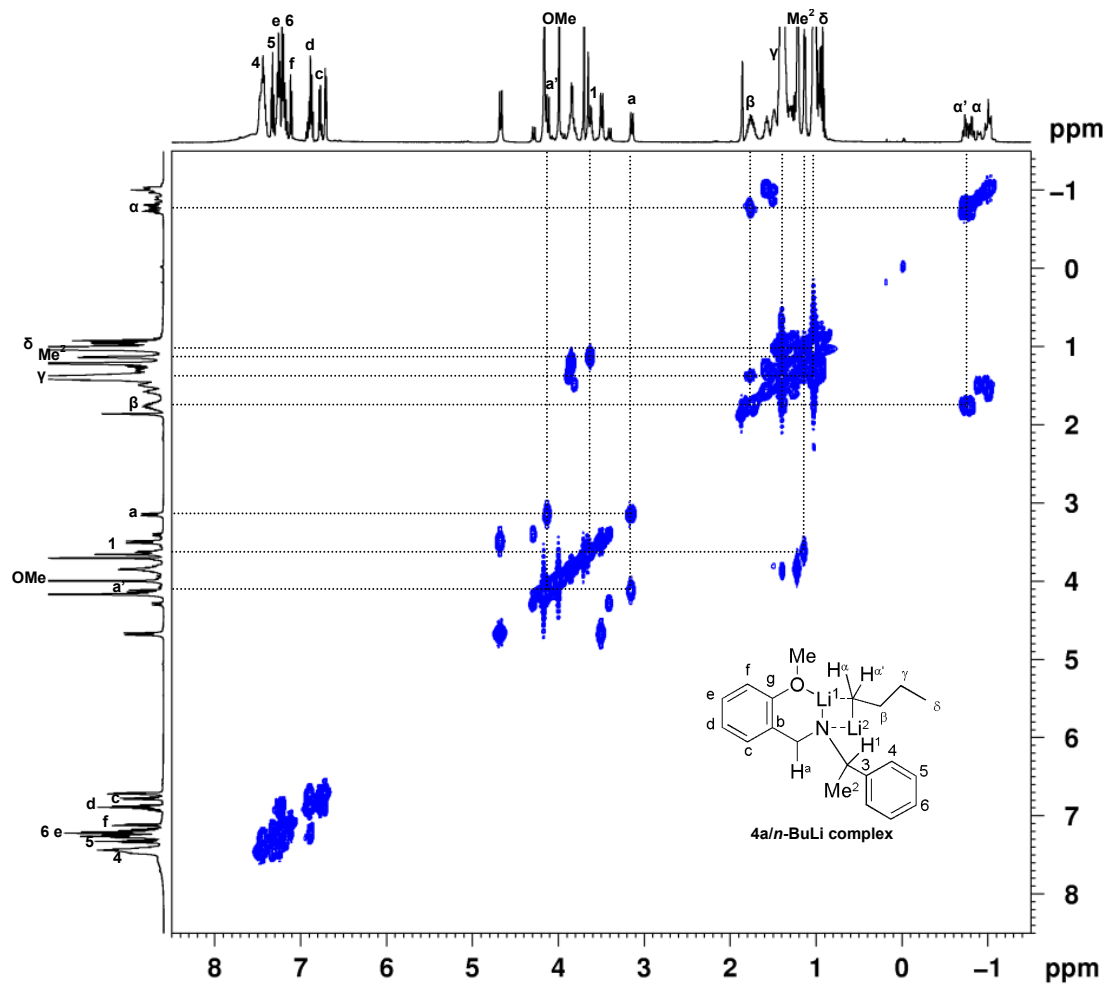

Figure S25.  $^1\text{H}$ ,  $^1\text{H}$ -COSY spectrum of **4a** + *n*-BuLi in  $\text{THF}_{d8}$  at 195K

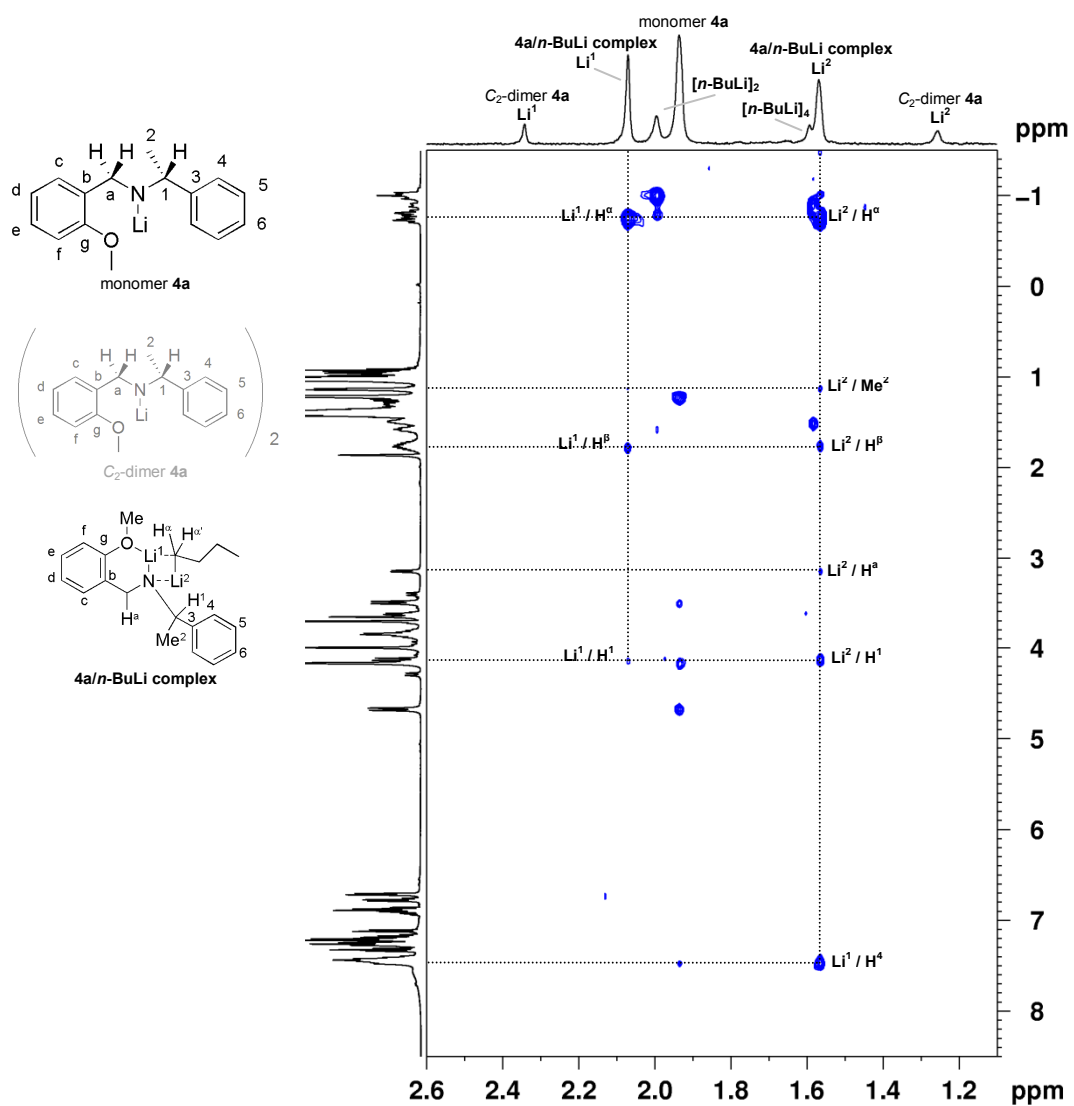

**Figure S26.**  ${}^6\text{Li}$ ,  ${}^1\text{H}$ -HOESY spectrum (mixing time  $\tau_m = 1.44\text{s}$ ) of **4a** + *n*-BuLi in  $\text{THF-}d_8$  at 195K



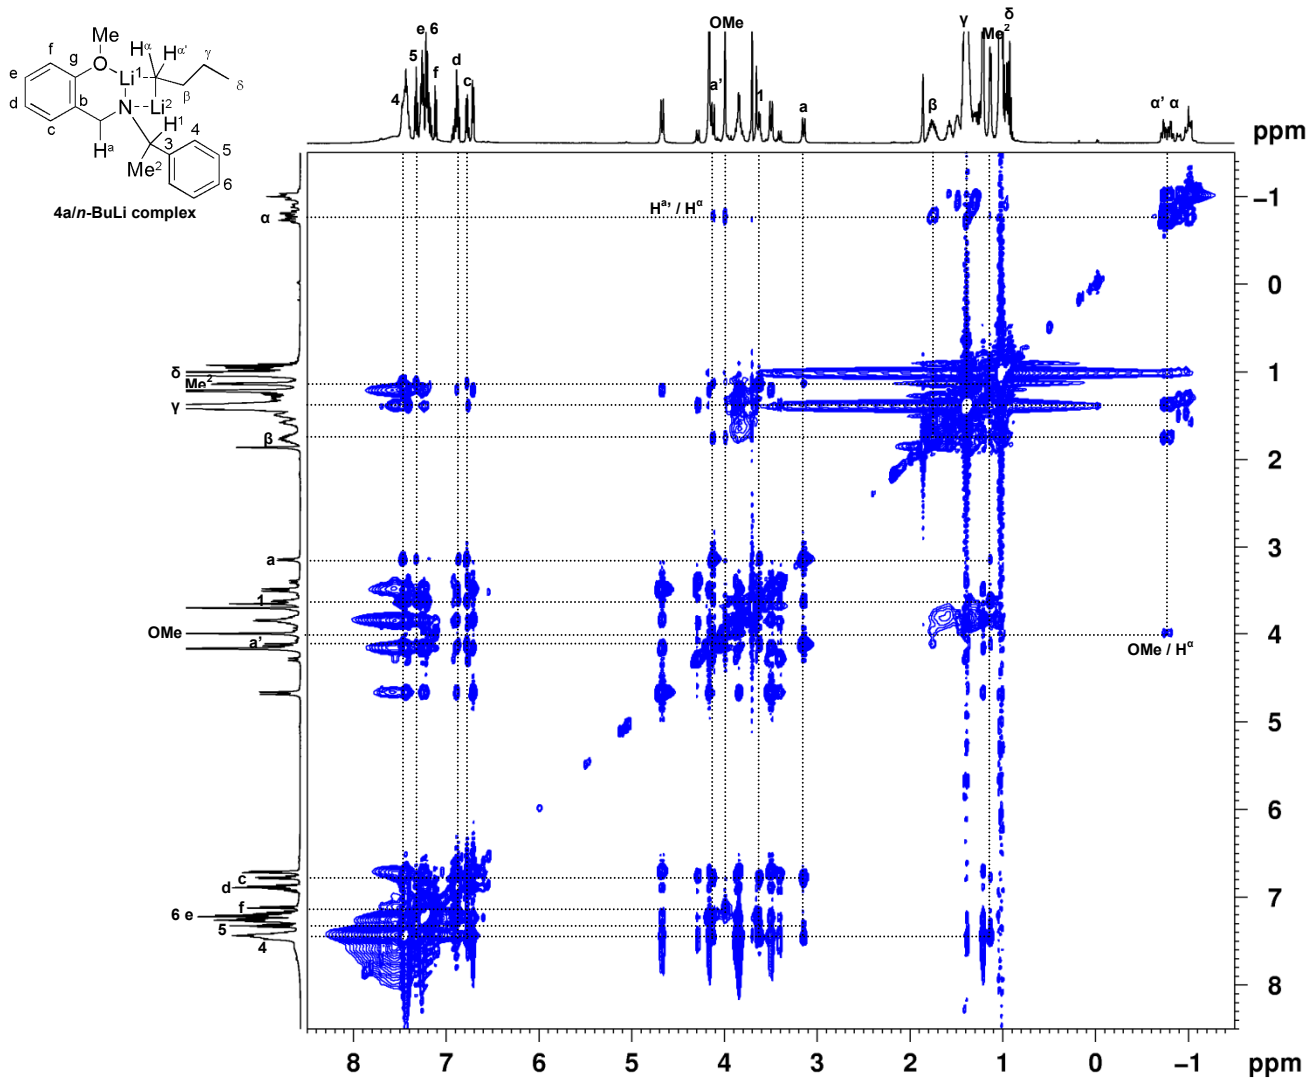

Figure S27.  $^1\text{H}, ^1\text{H}$ -NOESY spectrum (mixing time  $\tau_m = 0.60\text{s}$ ) of **4a** + *n*-BuLi in  $\text{THF}_{d8}$  at 195K

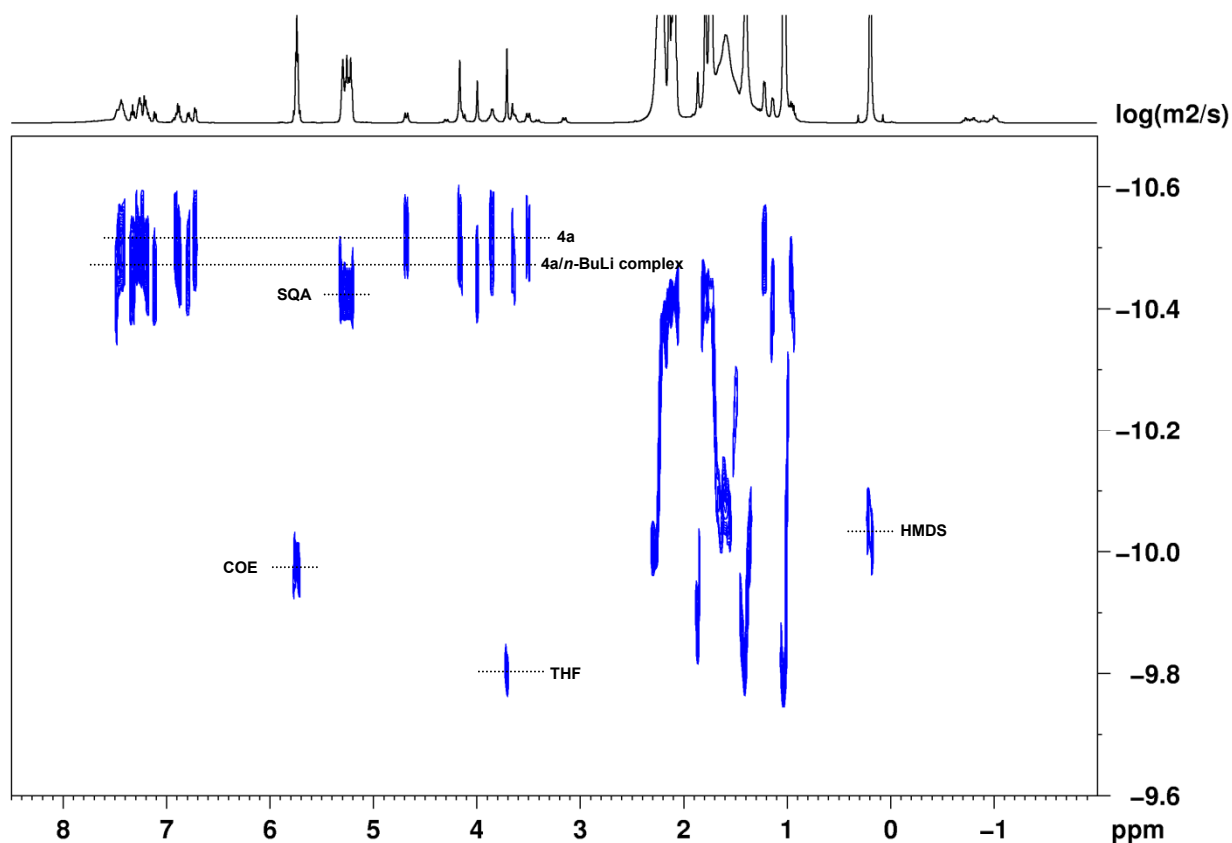

**Figure S28.**  $^1\text{H}$ -DOSY spectrum of **4a** / *n*-BuLi complex in  $\text{THF}_{d8}$  at 195K

**Figure S29.** Decay curves of  $^1\text{H}$ -DOSY for Internal References [COE (a), HMDS (b), SQA (c)], monomer **4a** (d),  $\text{C}_2$ -dimer **4a** (e) and **4a** / *n*-BuLi complex (f) in  $\text{THF}_{d8}$  at 195K

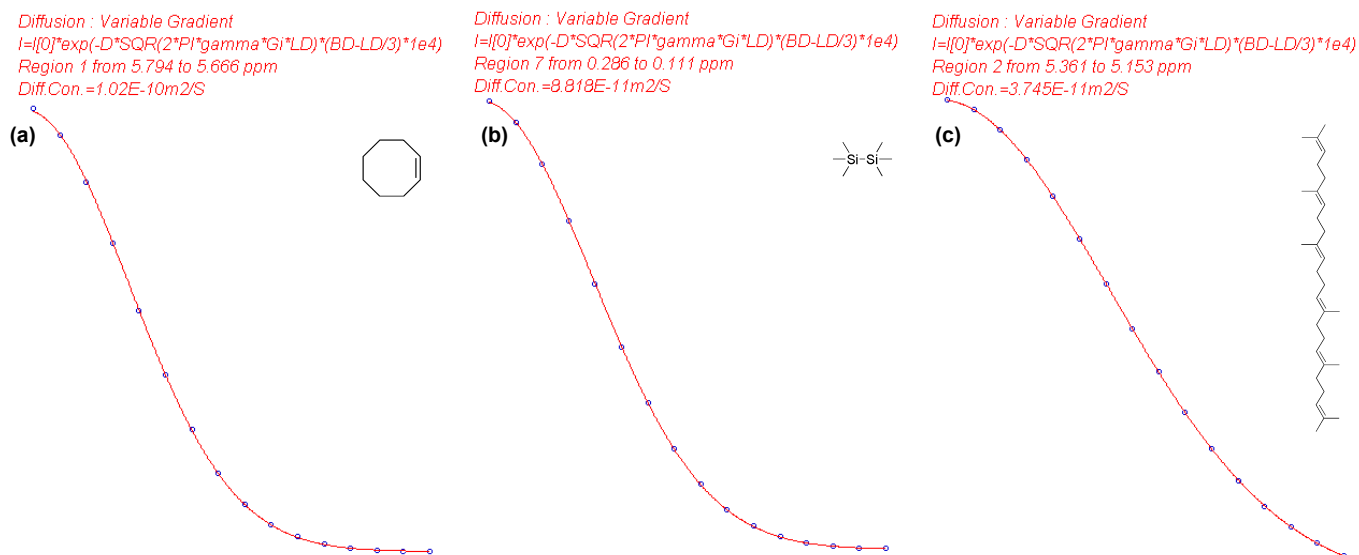

(Figure S29, continued)

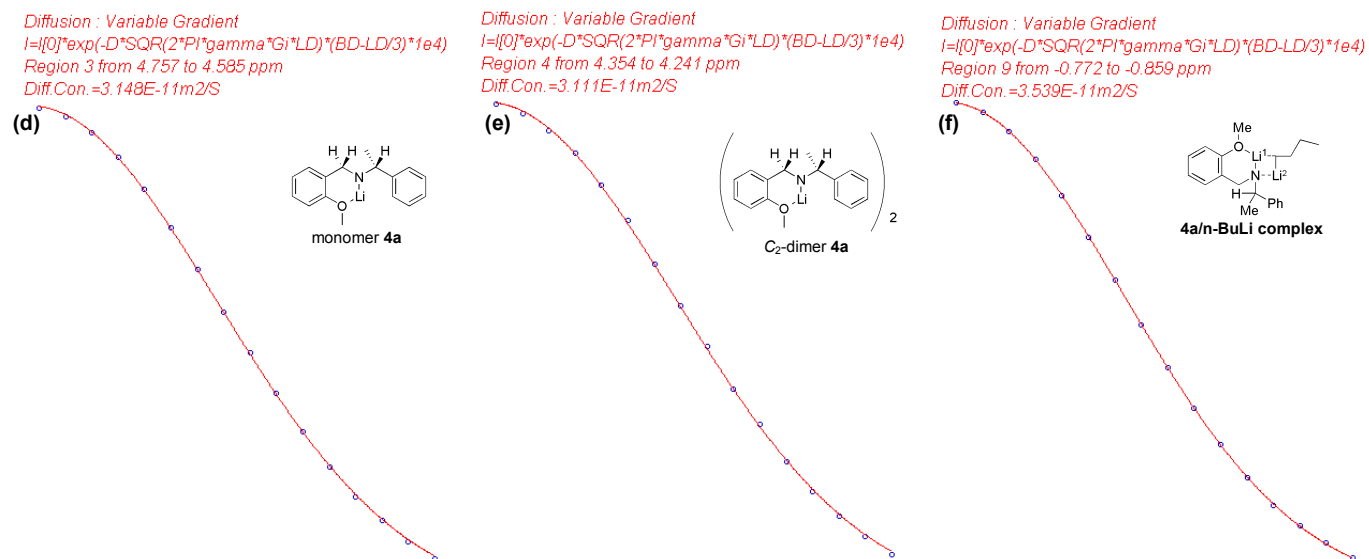

**Table S3.** D-FW analysis of <sup>1</sup>H-DOSY data of **4a/n-BuLi** complex in THF<sub>d8</sub> at 195K

| Compound                        | FW (g mol <sup>-1</sup> ) | LogFW | D (m <sup>2</sup> s <sup>-1</sup> ) | logD    | predicted FW (g mol <sup>-1</sup> ) | Error (%) |
|---------------------------------|---------------------------|-------|-------------------------------------|---------|-------------------------------------|-----------|
| COE                             | 110,2                     | 2,042 | 1,02E-10                            | -9,991  | 110,2                               |           |
| HMDS                            | 146,4                     | 2,165 | 8,82E-11                            | -10,054 | 146,4                               |           |
| SQA                             | 410,7                     | 2,613 | 3,75E-11                            | -10,426 | 410,7                               |           |
| THF <sub>d7</sub>               | 70,8                      | 1,850 | 1,49E-10                            | -9,827  | 79,1                                | -11,8     |
| monomer <b>4a</b>               | 519,2                     | 2,715 | 3,15E-11                            | -10,502 | 484,7 <sup>a</sup>                  | 6,6       |
| C <sub>2</sub> -dimer <b>4a</b> | 527,1                     | 2,722 | 3,11E-11                            | -10,507 | 494,5 <sup>b</sup>                  | 6,2       |
| <b>4a/n-BuLi</b>                | 446,8                     | 2,650 | 3,54E-11                            | -10,451 | 469,6 <sup>c</sup>                  | -5,1      |

<sup>a</sup>: the predicted FW is referred to a trisolvated monomer [(**4a**) + 3THF]. <sup>b</sup>: the predicted to FW is referred an unsolvated dimer [(**4a**)<sub>2</sub>]. <sup>c</sup>: the predicted FW is referred to a disolvated mixed dimer [(**4a**+*n*-BuLi) + 2THF].

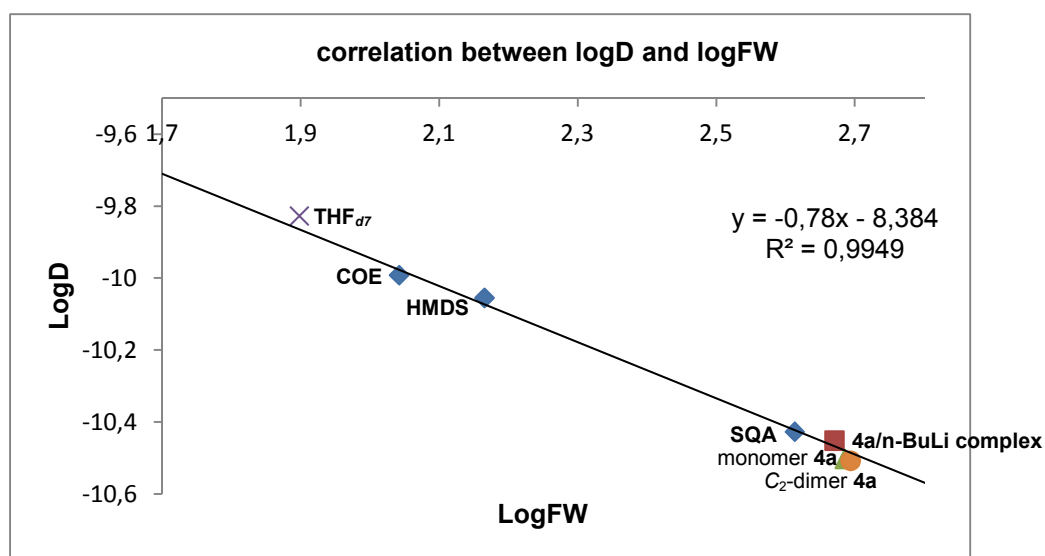

Supplement: c4dt01156b1.pdf [file c4dt01156b1.pdf]
